# Supplementary material for: Computational Disorder Analysis in Ethylene Response Factors Uncovers Binding Motifs Critical to Their Diverse Functions
Source: MDPI journal article supplement (doi:10.3390/ijms21010074), 2019-12-20
Supplement: s1 [file s1]

| Supplemental Table S1 |                               |                         |                                   |                                                                 |                              |                                       |                                                          |                                                                 |                              |                           |                                                                                       |                           |                              |                                    |                                                                                                     |                                                |                              |                                                        |                                                        |                                                        |                              |                                                    |                                                    |                                                                               |
|-----------------------|-------------------------------|-------------------------|-----------------------------------|-----------------------------------------------------------------|------------------------------|---------------------------------------|----------------------------------------------------------|-----------------------------------------------------------------|------------------------------|---------------------------|---------------------------------------------------------------------------------------|---------------------------|------------------------------|------------------------------------|-----------------------------------------------------------------------------------------------------|------------------------------------------------|------------------------------|--------------------------------------------------------|--------------------------------------------------------|--------------------------------------------------------|------------------------------|----------------------------------------------------|----------------------------------------------------|-------------------------------------------------------------------------------|
| Group I               | Group by Nakano and (Sakuma)* | Other names             | Stress/hormone function†          | Group IIb                                                       | Group by Nakano and (Sakuma) | Other names                           | Stress/hormone function†                                 | Group IV                                                        | Group by Nakano and (Sakuma) | Other names               | Stress/hormone function†                                                              | Group VIIa                | Group by Nakano and (Sakuma) | Other names                        | Stress/hormone function†                                                                            | Group VIIb                                     | Group by Nakano and (Sakuma) | Other names                                            | Stress/hormone function†                               | Group IXd                                              | Group by Nakano and (Sakuma) | Other names                                        | Stress/hormone function†                           |                                                                               |
| AT1G22190.1           | lb (A-6)                      | ATERF058                | wounding, cytokinin <sup>16</sup> | AT1G44830.1                                                     | llb (A-5)                    | ATERF014                              | biotic <sup>14</sup> , JA, SA <sup>3</sup>               | AT1G75490.1                                                     | lvb (A-2)                    | DREB2D, ATERF049          | heat, drought, salt <sup>13</sup>                                                     | AT1G53910.1               | vlla (B-2)                   | RAP2.12, ATERF074                  | drought, heat, light <sup>12</sup> , oxidative, osmotic, low oxygen <sup>17</sup>                   | AT1G12890.1                                    | vlllb (B-1)                  | ATERF088                                               | Biotic, GA <sup>7</sup>                                | Group IXd                                              | AT1G04370.1                  | ixc (B-3c)                                         | ATERF14                                            |                                                                               |
| AT1G36060.1           | lb (A-6)                      | ATERF055                |                                   | AT1G21910.1                                                     | llb (A-5)                    | ATERF016                              |                                                          | AT2G38340.1                                                     | lva (A-2)                    | DREB2E, ATERF046          |                                                                                       | AT1G72360.1               | vlla (B-2)                   | ATERF073                           |                                                                                                     | AT1G28160.1                                    | vlllb (B-1)                  | ATERF087                                               |                                                        | AT2G20880.1                                            | la (A-6)                     | ATERF053                                           | heat, ABA <sup>11</sup>                            |                                                                               |
| AT1G64380.1           | lb (A-6)                      | ATERF061                |                                   | AT1G77640.1                                                     | llb (A-5)                    | ATERF013                              |                                                          | AT2G40220.1                                                     | lvb (A-3)                    | AB4, ATERF052             | salt, ABA, GA <sup>12</sup> , water, osmotic                                          | AT2G47520.1               | vlla (B-2)                   | ATERF071                           |                                                                                                     | AT1G80580.1                                    | vlllb (B-5)                  | ATERF084                                               |                                                        | AT4G28140.1                                            | la (A-6)                     | ATERF054                                           |                                                    |                                                                               |
| AT1G78800.1           | lb (A-6)                      | RAP2.4, WIND1, ATERF059 |                                   | AT4G31060.1                                                     | llb (A-5)                    | ATERF015                              |                                                          | AT2G40340.1                                                     | lva (A-2)                    | DREB2C, ATERF048          | heat <sup>19</sup> , ABA <sup>12</sup> , salt <sup>18</sup> , oxidative <sup>14</sup> | AT3G14230.1               | vlla (B-2)                   | RAP2.2, ATERF075                   | biotic, oxidative, osmotic <sup>17</sup>                                                            | AT5G13910.1                                    | vlllb                        | LEP, ATERF085                                          |                                                        | AT5G43410.1                                            | ixc (B-3c)                   | ATERF096                                           | ABA, JA, SA, biotic, salt <sup>16</sup>            |                                                                               |
| AT2G22200.1           | lb (A-6)                      | ATERF056                |                                   | Os03g15660.1                                                    | llb                          | ATERF059                              |                                                          | AT2G40350.1                                                     | lva (A-2)                    | DREB2H, ATERF047          |                                                                                       | AT3G16770.1               | vlla (B-2)                   | RAP2.3, ATEBP, ATERF072            | GA, oxidative, osmotic <sup>17</sup>                                                                | AT5G18560.1                                    | vlllb (B-1)                  | ATERF086                                               |                                                        | Os02g42585.1                                           |                              |                                                    |                                                    |                                                                               |
| AT4G39780.1           | lb (A-6)                      | ATERF060                |                                   | Os06g10780.1                                                    | llb                          | OsERF119                              |                                                          | AT3G11020.1                                                     | lva (A-2)                    | DREB28, ATERF044          | salt, water <sup>15</sup>                                                             | Os02g54160.1              | vlla                         | OsEREBP1, OsERF070                 | biotic <sup>15</sup>                                                                                | Os02g32040.1                                   | vlllb                        | OsERF081                                               |                                                        | Os03g05590.1                                           | ixc                          | OsERF088, OsAP23                                   | salt <sup>41</sup>                                 |                                                                               |
| AT5G65130.1           | lb (A-6)                      | ATERF057                |                                   | Pp1s11_280v6.1                                                  |                              |                                       |                                                          | AT3G23220.1                                                     | ixc (B-3c)                   | ATERF095                  |                                                                                       | Os03g08470.1              | vlla                         | OsERF062                           |                                                                                                     | Os04g32790.1                                   | vlllb                        | OsERF082                                               |                                                        | Os04g18650.1                                           | ixc                          | OsERF128                                           |                                                    |                                                                               |
| Pp1s187_38v6.1        | llc                           | OsERF017                |                                   |                                                                 |                              |                                       |                                                          | AT3G57600.1                                                     | lvb (A-2)                    | DREB2F, ATERF051          |                                                                                       | Os05g29810.1              | vlla                         | OsERF061                           |                                                                                                     | Os07g47330.1                                   | vlllb                        | FZF, OsERF078                                          |                                                        | Os05g49010.1                                           | ixc                          | OsERF084                                           |                                                    |                                                                               |
| Os02g51670.1          | lb                            | OsERF051                |                                   |                                                                 |                              |                                       |                                                          | AT5G05410.1                                                     | lva (A-2)                    | DREB2A, ATERF045          | salt, water <sup>15</sup>                                                             | Os06g0390.1               | vlla                         | OsERF071                           |                                                                                                     | Os08g07700.1                                   | vlllb                        | OsERF080                                               |                                                        | Os08g49050.1                                           | ixc                          | OsERF090                                           |                                                    |                                                                               |
| Os03g09170.1          | lb                            | OsERF047                |                                   |                                                                 |                              |                                       |                                                          | AT5G18450.1                                                     | lvb (A-2)                    | DREB2G, ATERF050          |                                                                                       | Os07g42510.1              | vlla                         | OsERF065                           |                                                                                                     | Os12g41030.1                                   | xi                           | OsERF110                                               |                                                        | Pp1s51_80v6.1                                          |                              |                                                    |                                                    |                                                                               |
| Os04g44670.1①         | la                            | OsERF045                |                                   |                                                                 |                              |                                       |                                                          | Os01g07120.1                                                    | lva                          | OsDREB2A, OsERF040        | cold <sup>19</sup> , salt <sup>16</sup> , ABA, drought <sup>12</sup>                  | Os09g26420.1              | vlla                         | OsERF072, OsERBP2, OsBIERF1        | biotic <sup>19</sup> , ethylene, JA, ABA <sup>13</sup> , salt, cold, drought, wounding <sup>6</sup> | Os12g41060.1                                   | xi                           | OsERF112                                               |                                                        | Pp1s60_148v6.1                                         |                              |                                                    |                                                    |                                                                               |
| Os05g49700.1          | lb                            | OsERF052                | salt <sup>14</sup>                | Group IIIa                                                      |                              |                                       | Senescence, Abscission <sup>8</sup>                      | Group IV                                                        |                              |                           | drought, ethylene <sup>84</sup>                                                       | Group VIIa                |                              |                                    | biotic <sup>23</sup>                                                                                | Group VIIb                                     |                              |                                                        | plant development <sup>33</sup>                        | Group IXd                                              |                              |                                                    |                                                    |                                                                               |
| Os05g34730.1          | llc                           | OsERF131, OsERF1        |                                   | AT1G71450.1                                                     | llla (A-4)                   | FUF1, ATERF021                        |                                                          | Os03g64260.1                                                    | ixc                          | OsERF083                  |                                                                                       | Pp1s140_167v6.1①          | Group VIIb                   |                                    |                                                                                                     | Group VIIb                                     |                              |                                                        |                                                        | Pp1s72_230v6.1                                         |                              |                                                    |                                                    |                                                                               |
| Os06g11860.1          | lb                            | OsERF120                |                                   | AT5G07580.1                                                     | ixb (B-3b)                   | ATERF106                              |                                                          | Os05g39590.1                                                    | lvb                          | OsERF042                  |                                                                                       | Pp1s16_75v6.1             | Group VIIb                   |                                    |                                                                                                     | Group VIIb                                     |                              |                                                        |                                                        | Pp1s120_13v6.1                                         |                              |                                                    |                                                    |                                                                               |
| Os08g31580.1          | lb                            | OsERF048, OsDRAP1       |                                   | AT5G61590.1                                                     | ixb (B-3b)                   | ATERF107                              |                                                          | Os08g35240.1①                                                   | llb                          | OsERF012, OsDERF1         |                                                                                       | AT5G07310.1               | xa (B-4)                     | ATERF115                           |                                                                                                     | AT5G07310.1                                    | xa (B-4)                     | ATERF115                                               |                                                        | Pp1s174_86v6.1                                         |                              |                                                    |                                                    |                                                                               |
| Os09g20350.1          | lb                            | OsERF050                |                                   | Os02g35240.1                                                    | lllb                         | OsERF021                              |                                                          | Os08g45110.1                                                    | lvb                          | OsERF044                  |                                                                                       | AT5G61890.1               | xa (B-4)                     | ATERF114                           |                                                                                                     | Pp1s1221_67v6.1①                               | Group VIIc                   |                                                        |                                                        | Pp1s155_480v6.1                                        |                              |                                                    |                                                    |                                                                               |
| Os10g22600.1          | lb                            | OsERF051                |                                   | Os11g13840.1                                                    | lllb                         | OsERF019                              |                                                          | Pp1s23_27v6.1                                                   |                              |                           |                                                                                       | Os02g38090.1              | vlllb                        | OsERF079                           |                                                                                                     | Group VIIc                                     | Group by Nakano and (Sakuma) | Other names                                            | Stress/hormone function†                               | AT2G44840.1                                            | ixa (B-3a)                   | ATERF13, ATERF099                                  | ABA <sup>17</sup>                                  |                                                                               |
| Pp1s21_214v6.1        |                               |                         |                                   | Pp1s115_154v6.1                                                 |                              |                                       |                                                          | Pp1s181_44v6.1                                                  |                              |                           |                                                                                       | Os09g11460.1              | vllb                         | OsERF073                           |                                                                                                     | AT1G12980.1                                    | vlllb (B-1)                  | ESR1, DRN, ATERF089                                    | auxin <sup>11</sup>                                    | Os01g59780.1                                           |                              |                                                    |                                                    |                                                                               |
| Pp1s79_25v6.1         |                               |                         |                                   | Pp1s357_12v6.1                                                  |                              |                                       |                                                          | Pp1s162_92v6.1                                                  |                              |                           |                                                                                       | Os09g11480.1              | vlla                         | OsERF063                           |                                                                                                     | AT1G24590.1                                    | vlllb (B-1)                  | ATERF090, ESR2, DRNL                                   | cytokinin <sup>16</sup>                                | Os03g07940.1                                           |                              |                                                    |                                                    |                                                                               |
| Pp1s187_47v6.1        |                               |                         |                                   | Group IIIb                                                      |                              |                                       | cold <sup>19</sup> , drought <sup>12</sup>               | Group V                                                         |                              |                           | cold <sup>4</sup>                                                                     | Group VIIc                |                              |                                    | oxidative, IAA/Auxin, JA, biotic <sup>23</sup>                                                      | Group IXa                                      |                              |                                                        | ABA <sup>13</sup> , JA <sup>14</sup> , SA <sup>3</sup> | Group IXb                                              |                              |                                                    | salt, cold, ABA, drought <sup>16</sup>             |                                                                               |
| Pp1s335_8v6.1         |                               |                         |                                   | AT1G12630.1                                                     | lllb (A-4)                   | ATERF027                              |                                                          | Pp1s292_5v6.1                                                   |                              |                           |                                                                                       | AT4G34410.1               | xb (B-3)                     | RTTF1, ATERF109                    |                                                                                                     | AT1G03800.1                                    | vllla (B-1)                  | ATERF10, ATERF077                                      |                                                        | Aux/IAA <sup>17</sup>                                  | AT1G43160.1                  | xa (B-4)                                           | RAP2.6, ATERF108                                   | biotic <sup>2</sup> , ABA <sup>18</sup> , JA, SA, cold, osmotic <sup>18</sup> |
| Group Ila             | Group by Nakano and (Sakuma)  | Other names             | Stress/hormone function†          | AT1G63040.1                                                     | lllb (A-4)                   | ATERF026                              |                                                          | AT1G15360.1                                                     | va (B-6)                     | WIN1, SHN1, ATERF001      | biotic, water, drought <sup>19</sup>                                                  | Os02g06330.1              | vllla                        | OsERF132                           |                                                                                                     | AT4G17500.1                                    | ixa (B-3a)                   | ATERF1, ATERF100                                       |                                                        | Os01g64790.1                                           | xa                           | OsERF099, OsEREBP2                                 | salt, cold, ABA, drought <sup>16</sup>             |                                                                               |
| AT1G01250.1           | llla (A-4)                    | ATERF023                | drought <sup>22</sup>             | AT2G36450.1                                                     | llb (A-4)                    | HARDY, ATERF024                       | water, salt, biotic <sup>23</sup> , drought <sup>1</sup> | AT4G13620.1                                                     | lb (A-6)                     | ATERF062                  |                                                                                       | Os03g08460.1              | vlla                         | OsERBP89, OsERF060                 |                                                                                                     | ethylene/development <sup>19</sup>             | AT5G47220.1                  | ixa (B-3a)                                             |                                                        | ATERF2                                                 | Os02g34260.1                 | xa                                                 | OsERF098                                           |                                                                               |
| AT1G19210.1           | lllb                          | ATERF017                |                                   | AT5G52020.1                                                     | lllb (A-4)                   | ATERF025                              | biotic <sup>23</sup>                                     | AT4G17490.1                                                     | ixb (B-3b)                   | ATERF6, ATERF103          | cold <sup>4</sup>                                                                     | Os03g08490.1              | vlla                         | OsERF069                           | AT5G51190.1                                                                                         | ixb (B-3b)                                     | ATERF105                     | Os02g34270.1                                           |                                                        | xa                                                     | OsERF125                     |                                                    |                                                    |                                                                               |
| AT1G22810.1           | llc                           | ATERF019                |                                   | Os02g5420.1                                                     | llb                          | OsERF020                              |                                                          | AT5G11190.1                                                     | va (B-6)                     | SHN2, ATERF004            |                                                                                       | Os03g08500.1              | vlla                         | OsERF064, OsBIERF4                 | biotic, salt, cold, drought, wounding <sup>6</sup>                                                  | AT5G61600.1                                    | ixb (B-3b)                   | ATERF104                                               |                                                        | Os02g43790.1                                           | ixa                          | OsERF091, OsBIERF3                                 | biotic, salt, cold, drought, wounding <sup>6</sup> |                                                                               |
| AT1G33760.1           | llla (A-4)                    | ATERF022                |                                   | Os10g38000.1                                                    | llc                          | OsERF018                              |                                                          | AT5G25190.1                                                     | va (B-6)                     | ATERF003                  |                                                                                       | Os04g31970.1              | xa                           | OsERF100                           | Os04g54900.1                                                                                        | ixa                                            | OsERF092                     | Os03g22170.1                                           |                                                        | vlla                                                   | OsERF066                     |                                                    |                                                    |                                                                               |
| AT1G46768.1           | lla                           | RAP2.1, ATERF006        |                                   | Group IIlc                                                      |                              |                                       | cold, drought <sup>14</sup>                              | Group VI                                                        |                              |                           | cold <sup>4</sup>                                                                     | Group VIIc                |                              |                                    | ethylene/development <sup>19</sup>                                                                  | Group IXa                                      |                              |                                                        | ABA <sup>13</sup> , JA <sup>14</sup> , SA <sup>3</sup> | Group IXb                                              |                              |                                                    | salt, cold, ABA, drought <sup>16</sup>             |                                                                               |
| AT1G71520.1           | llc                           | ATERF020                |                                   | AT1G12610.1                                                     | lllc (A-1)                   | ATERF033                              |                                                          | AT5G25390.1                                                     | va (B-6)                     | SHN3, ATERF005            |                                                                                       | Os04g31970.1              | xa                           | OsERF100                           |                                                                                                     | AT4G17500.1                                    | ixa (B-3a)                   | ATERF1, ATERF100                                       |                                                        | Os01g64790.1                                           | xa                           | OsERF099, OsEREBP2                                 | salt, cold, ABA, drought <sup>16</sup>             |                                                                               |
| AT1G74930.1           | lllb                          | ATERF018                |                                   | AT1G63030.1                                                     | lllc (A-1)                   | DDF1, ATERF032                        | GA, salt, cold, drought <sup>19</sup>                    | AT5G47230.1                                                     | ixb (B-3b)                   | ATERF5, ATERF102          | cold <sup>4</sup>                                                                     | Os03g08460.1              | vlla                         | OsERBP89, OsERF060                 |                                                                                                     | AT5G47220.1                                    | ixa (B-3a)                   | ATERF2                                                 |                                                        | Os02g34260.1                                           | xa                           | OsERF098                                           |                                                    |                                                                               |
| AT1G23340.1           | lla                           | ATERF008                |                                   | AT4G25470.1                                                     | llc (A-1)                    | CRF2, DREB1C, ATERF030                | cold <sup>19</sup>                                       | Os02g10760.1                                                    | va                           | OsERF003                  |                                                                                       | Os03g08490.1              | vlla                         | OsERF069                           |                                                                                                     | AT5G51190.1                                    | ixb (B-3b)                   | ATERF105                                               |                                                        | Os02g34270.1                                           | xa                           | OsERF125                                           |                                                    |                                                                               |
| ATERF011, DEAR1, CEJ1 | lla                           | ATERF011, DEAR1, CEJ1   |                                   | AT4G25480.1                                                     | llc (A-1)                    | CRF3, DREB1A, ATERF031                | cold <sup>19</sup>                                       | Os04g31970.1                                                    | va                           | OsERF129                  |                                                                                       | Os04g31970.1              | xa                           | OsERF100                           | Os04g54900.1                                                                                        | ixa                                            | OsERF092                     | Os03g22170.1                                           |                                                        | vlla                                                   | OsERF066                     | biotic, salt, cold, drought, wounding <sup>6</sup> |                                                    |                                                                               |
| RAP2.9, ATERF007      | lla                           | RAP2.9, ATERF007        |                                   | AT4G25490.1                                                     | llc (A-1)                    | CBF1, DREB1B, ATERF029                | cold <sup>13</sup> , drought                             | Os06g0340.1                                                     | va                           | OsERF002                  | ABA, ethylene <sup>48</sup>                                                           |                           | Os04g52090.1                 | vlla                               | OsERF077                                                                                            | Os07g47790.1                                   | vlla                         | OsERF067                                               |                                                        | Os04g46220.1                                           | ixa                          | OsERF1                                             | biotic, ethylene/development <sup>22</sup>         |                                                                               |
| RAP2.10, ATERF009     | lla                           | RAP2.10, ATERF009       |                                   | AT4G36000.1                                                     | lla                          | RAP2.10, ATERF009                     |                                                          | AT4G36000.1                                                     | lla                          | OsERF001                  |                                                                                       | Os06g47590.1              | vllla                        | OsERF121                           | Os10g25170.1                                                                                        | vlla                                           | OsERF059                     | Os05g36100.1                                           |                                                        | xc                                                     | OsERF105                     |                                                    |                                                    |                                                                               |
| ATERF016              | llb                           | ATERF016                |                                   | AT5G21960.1                                                     | llb                          | ATERF016                              |                                                          | Os01g73770.1                                                    | llc                          | OsERF027, OsDREB1F        | drought, salt, cold <sup>49</sup>                                                     | Os08g42550.1              | xc                           | OsERF106                           | Pp1s1_34v6.1                                                                                        |                                                |                              | Pp1s14_458v6.1                                         |                                                        |                                                        |                              |                                                    |                                                    |                                                                               |
| ATERF010              | llb                           | ATERF010                |                                   | AT5G67190.1                                                     | llb                          | ATERF010                              |                                                          | Os02g45450.1                                                    | llc                          | OsERF025                  |                                                                                       | Pp1s17_332v6.1            |                              |                                    | Pp1s15_457v6.1                                                                                      |                                                |                              | Pp1s17_144v6.1①                                        |                                                        |                                                        |                              |                                                    |                                                    |                                                                               |
| OsERF011              | llb                           | OsERF011                |                                   | Os02g54050.1                                                    | llb                          | OsERF011                              |                                                          | Os04g48350.1                                                    | llc                          | OsERF030                  |                                                                                       | Pp1s107_45v6.1            |                              |                                    | Pp1s25_13v6.1                                                                                       |                                                |                              | Pp1s41_212v6.1                                         |                                                        |                                                        |                              |                                                    |                                                    |                                                                               |
| OsERF008              | llb                           | OsERF008                |                                   | Os04g55520.1                                                    | llb                          | OsERF008                              |                                                          | Os06g03670.1                                                    | llc                          | OsDREB1C, OsERF026        | cold, drought <sup>15</sup>                                                           | Pp1s174_79v6.1            |                              |                                    | Pp1s26_306v6.1                                                                                      |                                                |                              | Pp1s122_23v6.1                                         |                                                        |                                                        |                              |                                                    |                                                    |                                                                               |
| OsERF007              | llb                           | OsERF007                |                                   | Os06g07030.1                                                    | llb                          | OsERF007                              |                                                          | Os08g43200.1                                                    | llc                          | OsERF028                  |                                                                                       | Pp1s179_29v6.1            |                              |                                    | Pp1s37_29v6.1                                                                                       |                                                |                              | Pp1s160_12v6.1                                         |                                                        |                                                        |                              |                                                    |                                                    |                                                                               |
|                       |                               |                         |                                   | Os06g09717.1                                                    |                              |                                       |                                                          | Os08g43210.1                                                    | llc                          | OsERF029                  |                                                                                       | Pp1s225_102v6.1           |                              |                                    | Pp1s145_159v6.1                                                                                     |                                                |                              | Pp1s181_69v6.1                                         |                                                        |                                                        |                              |                                                    |                                                    |                                                                               |
| Os06g09760.1          | llb                           | OsERF016                |                                   | cold <sup>19</sup> , drought <sup>17</sup> , salt <sup>25</sup> | Os09g35010.1                 | llc                                   | OsDREB1B, OsERF031                                       | cold <sup>19</sup> , drought <sup>17</sup> , salt <sup>25</sup> | Pp1s296_69v6.1               |                           |                                                                                       | Development <sup>19</sup> | Group VIIc                   |                                    |                                                                                                     | oxidative, IAA/Auxin, JA, biotic <sup>23</sup> | Group IXa                    |                                                        |                                                        | ABA <sup>13</sup> , JA <sup>14</sup> , SA <sup>3</sup> | Group IXb                    |                                                    |                                                    | salt, cold, ABA, drought <sup>16</sup>                                        |
| Os06g09790.1          | llb                           | OsERF015                | Os09g35020.1                      |                                                                 | llc                          | OsERF133                              | Group                                                    | AT2G37130.1①                                                    | xc (B-4)                     | ATERF112                  |                                                                                       | Pp1s183_10v6.1            |                              |                                    | Pp1s199_50v6.1                                                                                      |                                                |                              | AT2G20350.1                                            | xb-l (B-6)                                             | ATERF120                                               |                              |                                                    |                                                    |                                                                               |
| Os06g09810.1          | llb                           | OsERF014                |                                   | Os09g35030.1                                                    | llc                          | OsDREB1A, OsERF024                    | cold, drought <sup>17</sup> , salt <sup>19</sup>         | AT2G37130.1①                                                    | xc (B-4)                     | ATERF112                  |                                                                                       | Pp1s183_10v6.1            |                              |                                    | Pp1s199_50v6.1                                                                                      |                                                |                              | AT5G19790.1                                            | vb (B-6)                                               | RAP2.11, ATERF002                                      | abiotic stress <sup>12</sup> |                                                    |                                                    |                                                                               |
| Os06g11940.1          | llb                           | OsERF013                | Group IIId                        |                                                                 |                              | cold, drought, wounding <sup>10</sup> | Group VIIa                                               |                                                                 |                              | Development <sup>19</sup> | Group VIIc                                                                            |                           |                              | ethylene/development <sup>19</sup> | Group IXa                                                                                           |                                                |                              | ABA <sup>13</sup> , JA <sup>14</sup> , SA <sup>3</sup> | Group IXb                                              |                                                        |                              | salt, cold, ABA, drought <sup>16</sup>             |                                                    |                                                                               |
|                       |                               |                         | AT1G71130.1                       | vi (B-5)                                                        | CRF8, ATERF070               |                                       | Cytokinin <sup>11</sup> , phosphate, GA <sup>10</sup>    | AT5G50080.1                                                     | xc (B-4)                     |                           | ATERF110                                                                              |                           | Pp1s296_32v6.1               |                                    |                                                                                                     |                                                | AT1G03800.1                  |                                                        | vllla (B-1)                                            | ATERF10, ATERF077                                      | Aux/IAA <sup>17</sup>        | AT1G43160.1                                        | xa (B-4)                                           | RAP2.6, ATERF108                                                              |
| Pp1s18_127v6.1        |                               |                         | AT1G77200.1                       | llle (A-4)                                                      | ATERF037                     |                                       | Os01g12440.1                                             | vi                                                              | OsERF053                     |                           | AT1G28360.1                                                                           | vllla (B-1)               | ATERF12, ATERF081            |                                    |                                                                                                     | AT4G17500.1                                    | ixa (B-3a)                   |                                                        | ATERF1, ATERF100                                       | Os01g64790.1                                           | xa                           | OsERF099, OsEREBP2                                 | salt, cold, ABA, drought <sup>16</sup>             |                                                                               |
| Pp1s15_186v6.1        |                               |                         | AT2G25820.1                       | llle (A-4)                                                      | ATERF042                     |                                       | Os01g46870.1                                             | vi                                                              | OsERF054                     |                           | AT1G28370.1                                                                           | vllla (B-1)               | ATERF11, ATERF081            |                                    | GA, ethylene biosynthesis <sup>18</sup>                                                             | AT5G47220.1                                    | ixa (B-3a)                   |                                                        | ATERF2                                                 | Os02g34260.1                                           | xa                           | OsERF098                                           |                                                    |                                                                               |
| Pp1s15_189v6.1        |                               |                         | AT2G44940.1                       | llld (A-1)                                                      | ATERF034                     |                                       | Os05g25260.1                                             | vi                                                              |                              |                           |                                                                                       |                           |                              |                                    |                                                                                                     |                                                |                              |                                                        |                                                        |                                                        |                              |                                                    |                                                    |                                                                               |
