# Supplementary material for: Computational Disorder Analysis in Ethylene Response Factors Uncovers Binding Motifs Critical to Their Diverse Functions
Source: MDPI journal article supplement (doi:10.3390/ijms21010074), 2019-12-20
Supplement: s1 [file s1]

Supplementary Table S2. Summary of conserved MoRFs in carboxy and amino terminal regions outside of the AP2 domains

|                     |                                                                                     |  |
|---------------------|-------------------------------------------------------------------------------------|--|
| Group I             |                                                                                     |  |
| I N1*               |                                                                                     |  |
| AT1G64380.1         | DIIEKPhL                                                                            |  |
| AT1G36060.1         | ELMEALqP                                                                            |  |
| AT1G22190.1         | ELMEALlP                                                                            |  |
| AT5G65130.1         | EFMEALeP                                                                            |  |
| Os06g11860.1        | ELMKALeP                                                                            |  |
| AT4G39780.1         | ELMKALqP                                                                            |  |
| AT1G78080.1         | ELMDALvP                                                                            |  |
| Os09g20350.1        | ELMRALeP                                                                            |  |
| Os03g09170.1        | ELMGALaP                                                                            |  |
| Os02g51670.1        | ELMKALeP                                                                            |  |
| Consensus sequences | [ED]-[LIF]-[MI]-[EDKRG]-[AK]-[LF]-x-[PL]                                            |  |
| I C1                |                                                                                     |  |
| AT1G64380.1         | FILarmPSfdpE.LIWE                                                                   |  |
| AT2G22200.1         | FgLrkfPSv..E.IDWD                                                                   |  |
| AT1G36060.1         | FmLgkcPSy..E.IDWA                                                                   |  |
| AT1G22190.1         | NaLeKyPSy..E.IDWD                                                                   |  |
| Pp1s187_47V6.1      | LlLgsvPSse.EqVDWS                                                                   |  |
| AT5G65130.1         | MgLhkyPSl..E.IDWD                                                                   |  |
| AT4G39780.1         | FgLekfPSv..E.IDWD                                                                   |  |
| Os06g11860.1        | FhLykcPSw..E.IDWD                                                                   |  |
| AT1G78080.1         | FsLeKyPSy..E.IDWD                                                                   |  |
| Os10g22600.1        | FaLrryPSw..E.IDWD                                                                   |  |
| Os09g20350.1        | FaLtkyPSy..E.IDWD                                                                   |  |
| Os03g09170.1        | FILhkyPSl..E.IDWD                                                                   |  |
| Os08g31580.1        | FaLtkyPSy..E.IDWD                                                                   |  |
| Os02g51670.1        | FhLrkyPSw..E.IDWD                                                                   |  |
| Consensus sequences | L-x(3)-P-[SN]-x(1,3)-E-x(0,1)-[VLI]-[DI]-W                                          |  |
| Subgroup IIA        |                                                                                     |  |
| IIa C1*             |                                                                                     |  |
| AT4G06746.1         | IRkKAaEVGarVDA                                                                      |  |
| AT4G36900.1         | IRrKAaEVGaQVDA                                                                      |  |
| Os04g55520.1        | IRkKAiEVGsrrVDA                                                                     |  |
| AT3G50260.1         | IRkKAteVGAQVDA                                                                      |  |
| AT2G23340.1         | IRrKAaEVGAQVDA                                                                      |  |
| AT5G67190.1         | IRkKAteVGAQVDA                                                                      |  |
| Os06g07030.1        | IRkKAaEVGarVDA                                                                      |  |
| AT1G46768.1         | IReKAaEVGarVDA                                                                      |  |
| Consensus sequences | I-R-x-K-A-x-E-V-G-x(2)-V-D-A                                                        |  |
| IIa C2*             |                                                                                     |  |
| AT4G06746.1         | LDMNklP...Eay..G                                                                    |  |
| AT4G36900.1         | VDLNklPpd.EtsddD                                                                    |  |
| Os04g55520.1        | PDLNqaPps.EnsdaE                                                                    |  |
| AT3G50260.1         | VDLNklPpd.EnlddD                                                                    |  |
| AT2G23340.1         | VDLNklPpd.EnsdgD                                                                    |  |
| AT5G67190.1         | VDLNklPpdPEssdeE                                                                    |  |
| Os06g07030.1        | PDLNrePpt.DtsddE                                                                    |  |
| AT1G46768.1         | PDLNqiP...Esg..D                                                                    |  |
| Consensus sequences | D-[ML]-N-x(2)-P-x(0,3)-[DE] EAR Motifs                                              |  |
| IIa C3              |                                                                                     |  |
| AT1G71520.1         | MEEdedkLsI                                                                          |  |
| Pp1s480_16V6.1      | LEEvE.LaW                                                                           |  |
| AT1G74930.1         | LDEsl.lIW                                                                           |  |
| Pp1s60_269V6.1      | LEDvd.LaF                                                                           |  |
| Pp1s8_127V6.1       | LEDvg.LaW                                                                           |  |
| Pp1s55_256V6.1      | LEDve.LaW                                                                           |  |
| Pp1s155_21V6.1      | LDDve.LaW                                                                           |  |
| Consensus sequences | [LM]-[ED]-[ED]-x(2,3)-[IL]-x-[FWI]                                                  |  |
| IIa C4              |                                                                                     |  |
| Pp1s259_96V6.1      | EDLlqeL                                                                             |  |
| Pp1s480_16V6.1      | DDInl.l                                                                             |  |
| Pp1s183_112V6.1     | DDFne.W                                                                             |  |
| Pp1s155_21V6.1      | DDLnf.L                                                                             |  |
| AT1G01250.1         | DDFwegI                                                                             |  |
| Pp1s8_127V6.1       | DDIkf.L                                                                             |  |
| Os06g11940.1        | DDLav.W                                                                             |  |
| Pp1s259_97V6.1      | EDLlqeL                                                                             |  |
| Pp1s55_256V6.1      | DDInf.L                                                                             |  |
| Consensus sequences | [ED]-D-[ILF]-x(2,3)-[LIW]                                                           |  |
| IIa C5              |                                                                                     |  |
| Pp1s276_3V6.1       | LWcF                                                                                |  |
| Pp1s15_189V6.1      | LWcF                                                                                |  |
| AT1G19210.1         | LWnF                                                                                |  |
| AT1G22810.1         | VYdY                                                                                |  |
| Os02g54050.1        | LWsF                                                                                |  |
| AT1G01250.1         | LYqY                                                                                |  |
| Pp1s259_94V6.1      | LWcF                                                                                |  |
| Pp1s15_186V6.1      | LWcF                                                                                |  |
| AT5G21960.1         | LWnF                                                                                |  |
| Pp1s259_97V6.1      | LWsF                                                                                |  |
| AT1G71520.1         | VYdY                                                                                |  |
| Pp1s259_96V6.1      | LWsF                                                                                |  |
| AT1G74930.1         | LWdF                                                                                |  |
| Pp1s117_23V6.1      | LWsF                                                                                |  |
| Os06g09810.1        | VYaF                                                                                |  |
| Pp1s55_253V6.1      | LWfF                                                                                |  |
| Pp1s133_11V6.1      | LWsY                                                                                |  |
| Os06g11940.1        | VYaF                                                                                |  |
| Os06g09717.1        | LWsF                                                                                |  |
| Consensus sequences | [LV]-[WYF]-x-[FY] LWSY Motif                                                        |  |
| Subgroup IIB        |                                                                                     |  |
| IIB C1*             |                                                                                     |  |
| Pp1s119_43V6.1      | PREIQFweVLnR                                                                        |  |
| Pp1s11_280V6.1      | PREIQFavVLdR                                                                        |  |
| Pp1s87_98V6.1       | PKEIQFavVLnR                                                                        |  |
| Pp1s86_33V6.1       | PREIQFleVLnR                                                                        |  |
| Consensus sequences | P-[RK]-EIQF-x(2)-VL-x-R                                                             |  |
| IIB C2*             |                                                                                     |  |
| AT1G44830.1         | EEgDir.LWNF                                                                         |  |
| Os06g10780.1        | EEgDia.LWSF                                                                         |  |
| AT1G21910.1         | EDaDip.LWSF                                                                         |  |
| AT1G77640.1         | DDvDip.LWSF                                                                         |  |
| Os03g15660.1        | EDgELmrLWSF                                                                         |  |
| Consensus sequences | [ED]-[ED]-x-[ED]-[LI]-x(1,2)-L-W-[SN]-F LWSY motif                                  |  |
| Subgroup IIIa       |                                                                                     |  |
| IIIa C1             |                                                                                     |  |
| AT1G71450.1         | LWD                                                                                 |  |
| Os11g13840.1        | LWD                                                                                 |  |
| Os02g35240.1        | LWD                                                                                 |  |
| Consensus sequences | L-W-D                                                                               |  |
| Subgroup IIIB       |                                                                                     |  |
| IIIB C1             |                                                                                     |  |
| Os02g45420.1        | EsLWsY                                                                              |  |
| AT1G12630.1         | EdLWgY                                                                              |  |
| AT2G36450.1         | DyLWnF                                                                              |  |
| AT5G52020.1         | DnLWsY                                                                              |  |
| AT1G63040.1         | EsLWsY                                                                              |  |
| Os05g49700.1        | ElIWeM                                                                              |  |
| Consensus sequences | [ED]-x-[LI]-W-x[YFM] LWSY-like Motif                                                |  |
| Subgroup IIIC       |                                                                                     |  |
| IIIC N1*            |                                                                                     |  |
| Os08g43200.1        | KRpAGRtKFqETRHPV                                                                    |  |
| Os09g35010.1        | KRpAGRtKFrETRHPV                                                                    |  |
| Os04g48350.1        | KRrAGRtKFkETRHPV                                                                    |  |
| AT4G25490.1         | KKpAGRkKFrETRHPi                                                                    |  |
| Os09g35020.1        | KRpAGRtKFrETRHPV                                                                    |  |
| AT1G63030.1         | KKrAGRriFkETRHPi                                                                    |  |
| AT5G51990.1         | KKrAGRkKFrETRHPi                                                                    |  |
| Os06g03670.1        | KRpAGRtKFrETRHPV                                                                    |  |
| Os01g73770.1        | KRrAGRkKFrETRHPV                                                                    |  |
| Os09g35030.1        | KRpAGRtKFrETRHPV                                                                    |  |
| AT1G12610.1         | KKrAGRrvFkETRHPV                                                                    |  |
| AT4G25480.1         | KKpAGRkKFrETRHPi                                                                    |  |
| Os02g45450.1        | KRrAGRtKFkETRHPV                                                                    |  |
| AT4G25470.1         | KKpAGRkKFrETRHPi                                                                    |  |
| Os08g43210.1        | KRpAGRtKFhETRHPV                                                                    |  |
| Consensus sequences | K-[RK]-x-A-G-R-x(2)-F-x-E-T-R-H-P-[VI] Positively charged motif prior to AP2 domain |  |

|                                         |         |  |
|-----------------------------------------|---------|--|
| IIic C1                                 |         |  |
|                                         |         |  |
| Os09g35010.1                            | DMpLWS  |  |
| Os04g48350.1                            | EVnLWS  |  |
| AT1G63030.1                             | DLsLWS  |  |
| AT5G51990.1                             | DVsLWS  |  |
| AT1G12610.1                             | DMSLWS  |  |
| AT4G25470.1                             | DVsLWS  |  |
| Os08g43200.1                            | EMeLWS  |  |
| AT4G25490.1                             | DVsLWS  |  |
| Os09g35020.1                            | DIA LWS |  |
| Os06g03670.1                            | DVtLWS  |  |
| Os09g35030.1                            | DVpLWS  |  |
| AT4G25480.1                             | DVsLWS  |  |
| Os02g45450.1                            | EVqLWS  |  |
| Os08g43210.1                            | DVsLWS  |  |
| Consensus sequences [ED]-[VMLI]-x-L-W-S |         |  |

|                                                                        |               |  |
|------------------------------------------------------------------------|---------------|--|
| <b>Subgroup IIId</b>                                                   |               |  |
| IIId C1*                                                               |               |  |
| AT5G25810.1                                                            | EeLgE.IVELPsL |  |
| AT4G32800.1                                                            | DdLdE.IVKLPsL |  |
| Os02g13710.1                                                           | DeL.EaIVELPrL |  |
| AT1G77200.1                                                            | EeLsE.IVELPsL |  |
| AT5G11590.1                                                            | EeLgE.IVELPsL |  |
| AT2G25820.1                                                            | E.LgD.IVELPsL |  |
| Os06g36000.1                                                           | EeLeE.IVELPpI |  |
| AT3G16280.1                                                            | ErL.EkIVELPnI |  |
| Consensus sequences [ED]-x-L-x-[ED]-x-I-V-[EK]-L-P-x-L EDLL-like motif |               |  |

|                                                               |            |  |
|---------------------------------------------------------------|------------|--|
| IIId C2                                                       |            |  |
| Os04g46410.1                                                  | DdadDFFFgE |  |
| Os04g46440.1                                                  | Dlp.DLLL.D |  |
| AT4G32800.1                                                   | Esn.EFViFD |  |
| Os02g43970.1                                                  | DaadDALF.D |  |
| Os10g41130.1                                                  | Dlp.DLLF.D |  |
| Os04g46400.1                                                  | Dlp.DLLL.D |  |
| AT3G60490.1                                                   | Dlp.DLFT.D |  |
| AT2G44940.1                                                   | Dlp.DLFTdE |  |
| AT1G77200.1                                                   | EsIsEFVYvD |  |
| Os02g43940.1                                                  | Dlp.DLLL.D |  |
| Consensus sequences [ED]-x(2,3)-[ED]-[LFA]-[LFIV]-x(0,1)-[ED] |            |  |

|                                     |        |  |
|-------------------------------------|--------|--|
| IIId C3                             |        |  |
| AT5G25810.1                         | DsadLW |  |
| Os01g10370.1                        | ElapLW |  |
| Os04g46410.1                        | EplvLW |  |
| Os02g43970.1                        | EeplLW |  |
| Os04g46400.1                        | Epl.LW |  |
| Os10g41130.1                        | EeplLW |  |
| Os04g46440.1                        | EepmLW |  |
| Pp1s14_196V6.1                      | EfdnLW |  |
| AT2G25820.1                         | Esf.LW |  |
| Consensus sequences [ED]-x(2,3)-L-W |        |  |

|                                                               |            |  |
|---------------------------------------------------------------|------------|--|
| <b>Group IV</b>                                               |            |  |
| IV N1*                                                        |            |  |
| Os05g27930.1                                                  | Et.IkR.WaE |  |
| Os01g07120.1                                                  | Et.I.KwWkE |  |
| AT3G11020.1                                                   | Dr.LkK.WkE |  |
| AT2G38340.1                                                   | EatLqR.WeE |  |
| AT2G40340.1                                                   | Ei.L.RqWrE |  |
| AT5G05410.1                                                   | Er.LkR.WkE |  |
| AT2G40350.1                                                   | Ei.LrK.WrE |  |
| Consensus sequences [ED]-x(1,2)-[LI]-x(0,1)-[RK]-x(0,1)-W-x-E |            |  |

|                                                                                       |                 |  |
|---------------------------------------------------------------------------------------|-----------------|--|
| IV N2*                                                                                |                 |  |
| Os05g27930.1                                                                          | KKGcmKKGKGGPEN  |  |
| Pp1s162_92V6.1                                                                        | KKGamKKGKGGPEN  |  |
| AT1G75490.1                                                                           | RKGcmRGKGGPDN   |  |
| Pp1s81_44V6.1                                                                         | KKGcmKKGKGGPEN  |  |
| AT3G11020.1                                                                           | KKGcmKKGKGGPDN  |  |
| AT2G40340.1                                                                           | RKGcmKKGKGGPEN  |  |
| AT2G40350.1                                                                           | RKGcmKKGKGGPEN  |  |
| AT5G05410.1                                                                           | KKGcmKKGKGGPEN  |  |
| Pp1s23_27V6.1                                                                         | KRGcmKKGKGGPEN  |  |
| Os08g45110.1                                                                          | RKGcmKKGKGGPEN  |  |
| Os01g07120.1                                                                          | KKGcmAKKGKGGPEN |  |
| AT2G38340.1                                                                           | KKGcmRGKGGPEN   |  |
| AT5G18450.1                                                                           | RKGcmKKGKGGPEN  |  |
| Pp1s292_5V6.1                                                                         | KKGamKKGKGGPEN  |  |
| Consensus sequences [KR]-[RK]-G-x(2)-[RKA]-G-K-G-G-P-[ED]-N Positively charged motifs |                 |  |

|                                                                                                 |                                      |  |
|-------------------------------------------------------------------------------------------------|--------------------------------------|--|
| <b>Group V</b>                                                                                  |                                      |  |
| V N1*                                                                                           |                                      |  |
| Pp1s17_332V6.1                                                                                  | MNLTISSIIEQGKPKtKk.WDpCGG..KvKEQaLqL |  |
| Pp1s225_102V6.1                                                                                 | MNLTISSILEHGKPKsKtwWDsCGGsnKgREQgLlL |  |
| Pp1s174_79V6.1                                                                                  | MNLTISSILEQGRPKsKnwWDpCGGg.KaREQgLqL |  |
| Pp1s179_56V6.1                                                                                  | MNLTISSIIEQGKPKaKncWDpCGGg.KiREQgLqL |  |
| Consensus sequences MNLTISSI-[IL]-E[QH]G-[RK]-PK-x-K-x(1,2)-WD-x-CGG-x(0,2)-K-x-[RK]-EQ-x-L-x-L |                                      |  |

|                                                                   |                                      |  |
|-------------------------------------------------------------------|--------------------------------------|--|
| V C1*                                                             |                                      |  |
| Pp1s17_332V6.1                                                    | LQ1yPIPPPELPWESFAALVKQRATSAAKRARVPSS |  |
| Pp1s225_102V6.1                                                   | LQ1hPIPPPELPWESFAALVKQRATSAAKRARVPSS |  |
| Pp1s174_79V6.1                                                    | LQ1yPIPPPELPWESFAALVKQRATSAAKRARVPSS |  |
| Pp1s179_56V6.1                                                    | LQq1PIPPPELPWESFAAVVKQRATSAAKRARVPSS |  |
| Consensus sequences LQ-x(2)-PIPPPELPWESFAA-[VL]-VKQRATSAAKRARVPSS |                                      |  |

|                                                |               |  |
|------------------------------------------------|---------------|--|
| V C2                                           |               |  |
| AT5G11190.1                                    | EDqlameMIEEL  |  |
| Os02g55380.1                                   | EEqhvegMIDEL  |  |
| Os06g40150.1                                   | EErialqMIEEL  |  |
| AT1G15360.1                                    | EEkvalqMIEEL  |  |
| AT5G25390.1                                    | DDqmamqMIEEL  |  |
| Os06g08340.1                                   | EEqyvdaqMIEEL |  |
| Os02g10760.1                                   | EEkialqMIEEL  |  |
| Os04g56150.1                                   | DEyvee.MIqBEL |  |
| AT5G25190.1                                    | EEdhieqMIEEL  |  |
| Consensus sequences [ED]-[ED]-x(4,5)-M-I-x-E-L |               |  |

|                                                                                                                   |                       |  |
|-------------------------------------------------------------------------------------------------------------------|-----------------------|--|
| <b>Group VI-L</b>                                                                                                 |                       |  |
| VI-L N1                                                                                                           |                       |  |
| Os01g04020.1                                                                                                      | RrVrVvfeDpdATDsDSDDD  |  |
| AT1G68550.1                                                                                                       | RkVrIivnDpyATDdSSSDE  |  |
| Os09g13940.1                                                                                                      | RkVrVfcsDpdATDsSDEDD  |  |
| AT1G22985.1                                                                                                       | RiVrIsftDmeATDsSSSED  |  |
| AT3G25890.1                                                                                                       | RkLrFvvnDpyATDySSSEE  |  |
| AT4G27950.1                                                                                                       | RlVrVsmtdRrdATDsSSDEE |  |
| AT1G25470.1                                                                                                       | RtVrIvftDpdATDdSSSSS  |  |
| AT4G23750.1                                                                                                       | RiLrIsvtDpdATDsSSDDE  |  |
| AT1G49120.1                                                                                                       | KtIsVicnDpdATDsSSDDE  |  |
| AT2G46310.1                                                                                                       | KiVkiIvtDpcATDsSSDEE  |  |
| AT4G11140.1                                                                                                       | RiLrIsvtDpyATDsSSDDE  |  |
| AT5G53290.1                                                                                                       | KkVsIcytDpdATDsSSDED  |  |
| Os08g27220.1                                                                                                      | RrIrIsysDpdATDsDSDDSD |  |
| AT3G61630.1                                                                                                       | RlVrItvtDpfATDsSSDDD  |  |
| Consensus sequences [KR]-x-[VLI]-x-[IVF]-x(3)-D-x(2)-A-T-D-x-[SD]-[SD]-[SDE]-[SED]-[SED] Highly charged SDE Motif |                       |  |

|                                                                               |              |  |
|-------------------------------------------------------------------------------|--------------|--|
| VI-L N2                                                                       |              |  |
| AT3G25890.1                                                                   | Rr.KRYVcEIdL |  |
| AT1G68550.1                                                                   | RkmKRIVrEInF |  |
| Os09g13940.1                                                                  | KkeRRFSrEIlI |  |
| AT4G27950.1                                                                   | RrvKRlInEIrV |  |
| AT1G25470.1                                                                   | RkvKRFVhEItF |  |
| AT1G49120.1                                                                   | KppKRYVsKiCv |  |
| AT4G23750.1                                                                   | RrvKKFVnEVyL |  |
| AT1G22985.1                                                                   | RrgKKLVkEivI |  |
| AT2G46310.1                                                                   | Rv.KRYVdEIrF |  |
| AT4G11140.1                                                                   | RrvKKYVKEVvL |  |
| AT5G53290.1                                                                   | RrvKRFVnEItV |  |
| AT3G61630.1                                                                   | Rv.KRYVKEIrF |  |
| Consensus sequences [KR]-x(0,2)-[KR]-[KR]-[YIFL]-[VFIS]-x-[EK]-[VLI]-x-[IVLF] |              |  |

|                                                                                                                      |                                     |  |
|----------------------------------------------------------------------------------------------------------------------|-------------------------------------|--|
| VI-L C1*                                                                                                             |                                     |  |
| AT1G25470.1                                                                                                          | FLt.Denil.LdDYsllenDIn...FsrfEnsl.P |  |
| Os01g04020.1                                                                                                         | VLftEdml..LgDFaeed.DLldldIgd.DfcedF |  |
| AT3G25890.1                                                                                                          | LLteEnnnqmLdDYcgid.DLdi..Igl.Ecdg.P |  |
| AT1G68550.1                                                                                                          | FLadDg...FdDFgllD.DIgg..Fe..Dng..P  |  |
| Os08g27220.1                                                                                                         | FL-dDn..d.M.DFklssdDLs...Fl.fDig..F |  |
| Consensus sequences [FLV]-L-x(1,2)-[DE]-x(1,5)-[MLF]-x(0,1)-D-[FY]-x(4,5)-D-[LI]-x(1,4)-[FI]-x(1,3)-[ED]-x(2,4)-[FP] |                                     |  |

|                     |                                    |  |
|---------------------|------------------------------------|--|
| VI-L C2*            |                                    |  |
| AT1G25470.1         | LPdc.DFt..EM                       |  |
| Os01g04020.1        | IPsgyDFgrgDM                       |  |
| AT3G25890.1         | LPdy.DFs..DV                       |  |
| AT1G68550.1         | LPdf.DFa..DV                       |  |
| Consensus sequences | [LI]-P-x(2,3)-D-F-x(1,3)-[ED]-[VM] |  |

|                     |                                                                                         |  |
|---------------------|-----------------------------------------------------------------------------------------|--|
| VI-L C3*            |                                                                                         |  |
| AT1G49120.1         | LLDfdpliDdFkleDfPmdDlglLgD                                                              |  |
| AT2G46310.1         | LPDlfrsgDyFwdsE.ItpDpl.FlD                                                              |  |
| AT5G53290.1         | PLDtptfl.DnYfn.EsPp.Ems.IfD                                                             |  |
| AT4G27950.1         | PLDitfl.DnYfn.EsLp.Dis.IfD                                                              |  |
| AT3G61630.1         | LPDislagEcFwdtE.IapDl1.FlD                                                              |  |
| Consensus sequences | [LMP]-[LAP]-D-x(4,5)-[DE]-x-[FYI]-x(2,3)-[DE]-x(0,1)-[PLI]-x(1,2)-[ED]-x(2,3)-[LFI]-x-D |  |

|                     |                                                     |  |
|---------------------|-----------------------------------------------------|--|
| VI-L C4             |                                                     |  |
| AT1G68550.1         | SalpDfd..FaDvedlqLa.D                               |  |
| AT3G25890.1         | SelpDyd..FsDve...I..D                               |  |
| AT4G27950.1         | SeikEigssFnDldds1Is.D                               |  |
| AT4G23750.1         | SwhmEdh..FgDigd1.FgsD                               |  |
| AT1G25470.1         | SttkEvfttF.DfsdvkIp.D                               |  |
| AT2G46310.1         | SwdvDef..FgDhl...L..D                               |  |
| AT4G11140.1         | SwhvEdh..FgDigd1.FgsD                               |  |
| AT5G53290.1         | SsikDmgstFsDfdds1Is.D                               |  |
| AT3G61630.1         | SspwDvdhfF.DhhhsF..D                                |  |
| Consensus sequences | S-x(3)-[DE]-x(2,4)-F-x(0,1)-D-x(2,5)-[LFI]-x(0,2)-D |  |

|                          |                                                             |  |
|--------------------------|-------------------------------------------------------------|--|
| <b>Group VI</b><br>VI N1 |                                                             |  |
| Os06g06540.1             | VRVLCrDhDaTDS.SgdDD                                         |  |
| Os01g46870.1             | VRIFwdDpDlTDS.SgeDE                                         |  |
| Os07g12510.1             | VRIIfrDeDaTDSsSseDE                                         |  |
| Os03g60120.1             | VRILvrDaDaTDSsSseDE                                         |  |
| Os01g12440.1             | VRVFcdDfDaTDSsSdeDE                                         |  |
| Os05g25260.1             | VRVYfvDaDaTDtD\$sgDE                                        |  |
| Consensus sequences      | VR-[VI]-[LFYI]-x(2)-D-x-[DE]-x-TD-[ST]-x(0,1)-S-x(2)-D-[DE] |  |

|                     |                                                                                       |  |
|---------------------|---------------------------------------------------------------------------------------|--|
| VI C1*              |                                                                                       |  |
| Os06g06540.1        | DgFfsDVggd.Dl..FaAeP.F                                                                |  |
| Os01g46870.1        | DyFq.DLr...Dl..FpLnP.L                                                                |  |
| Os05g25260.1        | E.F..DWlpwwEgedF.VtAgL                                                                |  |
| Os01g12440.1        | DdFfgDIt...Dl..FqipV.V                                                                |  |
| Consensus sequences | [DE]-x(0,1)-F-x(0,2)-D-[WVLI]-x(1,4)-[DE]-x(1,3)-F-x(0,1)-[ALIV]-x-[PVA]-x(0,1)-[FLV] |  |

|                                 |                                         |  |
|---------------------------------|-----------------------------------------|--|
| <b>Subgroup VIIa</b><br>VIIa N1 |                                         |  |
| Os02g54160.1                    | MCGGAIihhLkghP                          |  |
| AT3G16770.1                     | MCGGAIIsdYa..P                          |  |
| Os03g08470.1                    | MCGGAILaeFipaP                          |  |
| Os05g29810.1                    | MCGGAIIdFvp.P                           |  |
| Os06g09390.1                    | MCGGAILsdLippP                          |  |
| AT2G47520.1                     | MCGGAIIsdFi..W                          |  |
| Os09g26420.1                    | MCGGAIIsGFlp.P                          |  |
| Os07g42510.1                    | MCGGSILgdLhl.P                          |  |
| AT3G14230.1                     | MCGGAIIsdFippP                          |  |
| AT1G53910.1                     | MCGGAIIsdFippP                          |  |
| Consensus sequences             | MCGG-[AS]-I-[IL]-x(2)-[FLY]-x(1,3)-[PW] |  |

|                     |                                    |  |
|---------------------|------------------------------------|--|
| VIIa N2*            |                                    |  |
| Os02g54160.1        | RRATeglLW                          |  |
| AT3G16770.1         | RKLTaeelW                          |  |
| Os03g08470.1        | KRVTashLW                          |  |
| Os06g09390.1        | RRVTagdLW                          |  |
| AT3G14230.1         | LRVTnefIW                          |  |
| Os09g26420.1        | RRVTadvLW                          |  |
| Os07g42510.1        | RTVNagdLW                          |  |
| AT1G53910.1         | RRVTsefIW                          |  |
| Consensus sequences | [KRL]-[RKT]-[VAL]-[TN]-x(3)-[LI]-W |  |

|                     |                                    |  |
|---------------------|------------------------------------|--|
| VIIa N3             |                                    |  |
| Os02g54160.1        | DEDFEADFeeF                        |  |
| Os03g08470.1        | VDDFEAAFeqF                        |  |
| Os06g09390.1        | EDDFEADFeeF                        |  |
| Os09g26420.1        | EEDFEADFreF                        |  |
| Os07g42510.1        | DDDFEADFeeF                        |  |
| AT3G14230.1         | DDDFEADFqgF                        |  |
| AT1G53910.1         | DAEFEADFqgF                        |  |
| Consensus sequences | [DEV]-[EDA]-[DE]-FEA-[DA]-F-x(2)-F |  |

|                     |                                 |  |
|---------------------|---------------------------------|--|
| VIIa C1             |                                 |  |
| Os02g54160.1        | EPyMrFL                         |  |
| AT1G72360.1         | ENqTeYF                         |  |
| Os03g08470.1        | DPfmLFQ                         |  |
| Os06g09390.1        | EPyMkFL                         |  |
| AT2G47520.1         | EDyMrFY                         |  |
| Os09g26420.1        | DPeMkYL                         |  |
| AT3G14230.1         | DDlMaYL                         |  |
| Consensus sequences | [DE]-[PND]-x-[MT]-x-[FY]-[FYLQ] |  |

|                     |                                                 |  |
|---------------------|-------------------------------------------------|--|
| VIIa C2*            |                                                 |  |
| Os02g54160.1        | LWSFDDM                                         |  |
| Os03g08470.1        | LWSFDDF                                         |  |
| Os06g09390.1        | LWSFDDM                                         |  |
| AT3G14230.1         | LWSLDEI                                         |  |
| Os09g26420.1        | IWSLDEL                                         |  |
| Os07g42510.1        | LWSFDDM                                         |  |
| AT1G53910.1         | LWSIDEI                                         |  |
| Consensus sequences | [LI]-WS-[FLI]-D-[ED]-[FMLI] Extended LWSY motif |  |

|                                 |                                                     |  |
|---------------------------------|-----------------------------------------------------|--|
| <b>Subgroup VIIb</b><br>VIIb N1 |                                                     |  |
| AT5G61890.1                     | KRpfggDeseer...EEdEnlFpvFsarsqhD                    |  |
| Os09g11480.1                    | KRggggD.....DDwEaaFreFiagdddd                       |  |
| Os09g11460.1                    | RRklavD.....EDwEaaFreFlsrhdhd                       |  |
| AT5G07310.1                     | KRpfrgDesdekkeaDDEniFpfFsarsgyD                     |  |
| Consensus sequences             | KR-x(4)-D-x(0,8)-[DE]-[ED]-x-E-x(2)-F-x(2)-F-x(6)-D |  |

|                     |                                                                      |  |
|---------------------|----------------------------------------------------------------------|--|
| VIIb C1*            |                                                                      |  |
| Ppls149_253V6.1     | PIqtLFggss....SrveKsiltsvPalkvsstg..WSpG                             |  |
| Ppls90_184V6.1      | PVqtLFgdamgiaskSvk.KplthsvPvlevspsg..WSmD                            |  |
| Ppls124_33V6.1      | PIqtLFqdtmgktsySak.KpsilavPpvrtsaip..WSlG                            |  |
| Ppls127_75V6.1      | PIhaLFeeaghvve.SkrqRvmkkptPitptter...LSvG                            |  |
| Ppls105_212V6.1     | PIqtLFgesli....Slk.KplihsvPavdvsvsqveWSlG                            |  |
| Ppls487_24V6.1      | PIqvPfeeaghvad.SkrqRtlkkptPitptteg....LSvG                           |  |
| Consensus sequences | P-[IV]-x(2)-[LP]-F-x(4,9)-S-x(2,3)-[KR]-x(6)-P-x(6,10)-[LW]-S-x-[GD] |  |

|                     |                                                      |  |
|---------------------|------------------------------------------------------|--|
| VIIb C2*            |                                                      |  |
| Ppls149_253V6.1     | VFLNSDnPetkP.....R                                   |  |
| Ppls90_184V6.1      | VILNSEsPeivAallq..K                                  |  |
| Ppls124_33V6.1      | VIVNSEsPeivAtppqqrkK                                 |  |
| Ppls127_75V6.1      | VILNSEaAcatPptphdaK                                  |  |
| Ppls105_212V6.1     | VILNTEsPetkPts....R                                  |  |
| Ppls487_24V6.1      | VILNSEaAcatPptphdaK                                  |  |
| Consensus sequences | V-[FI]-[LV]-N-[TS]-[ED]-x-[AP]-x(3)-[AP]-x(0,6)-[KR] |  |

|                     |                                                    |  |
|---------------------|----------------------------------------------------|--|
| VIIb C3*            |                                                    |  |
| Ppls149_253V6.1     | pFLIDLNFPPcl.D                                     |  |
| Ppls90_184V6.1      | pFLLDLNFPPssdD                                     |  |
| Ppls124_33V6.1      | pFLLDLNsPPcldE                                     |  |
| Ppls127_75V6.1      | pFLLDLNqPPck.D                                     |  |
| Ppls105_212V6.1     | sILLDLNFPPchdE                                     |  |
| Ppls487_24V6.1      | pFLLDLNqPPcs1E                                     |  |
| Consensus sequences | [FI]-L-[LI]-D-L-N-x-P-P-x(2,3)-[ED] EAR-like Motif |  |

|                                  |                                                                 |  |
|----------------------------------|-----------------------------------------------------------------|--|
| <b>Subgroup VIIc</b><br>VIIc N1* |                                                                 |  |
| Os03g08500.1                     | MCGGAILAeLiPsa.PaaRrvTAghVWP                                    |  |
| Os03g08460.1                     | MCGGAILAdFtParvP..RrlTAaeLLP                                    |  |
| Os03g08490.1                     | MCGGAILANiiPatpP..RpaTAahVWP                                    |  |
| Consensus sequences              | MCGGAILA-x-[LIF]-x-P-x(2,3)-P-x(0,2)-R-x(2)-TA-x(2)-[VL]-[WL]-P |  |

|                     |                                                                                               |  |
|---------------------|-----------------------------------------------------------------------------------------------|--|
| VIIc C1*            |                                                                                               |  |
| Ppls61_230V6.1      | EDdPylvsd..MArgMLiqPPsysddd.DS                                                                |  |
| Ppls83_10V6.1       | DDnFynqvde.MArgLMi rPPnndsddsDD                                                               |  |
| Ppls1_34V6.1        | EDqFdvrdl.YNalLIppPYyndtrd.DS                                                                 |  |
| Ppls199_50V6.1      | DDdFynqvhe.MArgMMmqPPksdsddsDE                                                                |  |
| Ppls296_32V6.1      | DEiVsrssasdWft..PFedPWcsnhal.ED                                                               |  |
| Ppls26_306V6.1      | DDdPrnqmnr.IAqaMLidPPnhdsddtDE                                                                |  |
| Ppls45_159V6.1      | DEdPlgatwe.VPdeMMv.FLtpprevlyDS                                                               |  |
| Consensus sequences | [ED]-[ED]-x-[VPF]-x(5,7)-[WVIMY]-[FPAN]-x(1,2)-[PML]-[FMLI]-x(1,2)-P-[WLPY]-x(4,7)-[ED]-[EDS] |  |

|                                                               |         |  |
|---------------------------------------------------------------|---------|--|
| VIic C2                                                       |         |  |
| Pp1s83_10V6.1                                                 | EDPPLcW |  |
| Pp1s26_306V6.1                                                | DDPPL.W |  |
| Pp1s61_230V6.1                                                | NGPSL.W |  |
| Pp1s1_34V6.1                                                  | GGFSL.W |  |
| Pp1s199_50V6.1                                                | GDPLL.W |  |
| Pp1s296_32V6.1                                                | TDFPY.L |  |
| Pp1s45_159V6.1                                                | DDLPP.W |  |
| Consensus sequences [TEDGN]-[DG]-[FLP]-[PS]-[YPL]-x(0,1)-[LW] |         |  |

|                                                                                 |                      |  |
|---------------------------------------------------------------------------------|----------------------|--|
| VIic C3*                                                                        |                      |  |
| Os03g08500.1                                                                    | ALlFaDQYnhfnggayeSL  |  |
| Os06g47590.1                                                                    | PLpFdLNMpppeeeId.MA  |  |
| AT4G34410.1                                                                     | MMmMdFGNgdssdsdgn.TI |  |
| Os04g52090.1                                                                    | GVgLdLNLpppie....EA  |  |
| Os04g34970.1                                                                    | PVrPlFHGgngweqrgdSA  |  |
| Os03g08460.1                                                                    | PLsMaLQLqyaa....MI   |  |
| Os03g08490.1                                                                    | PF1FgDQFgdlnggafaSL  |  |
| Os02g06330.1                                                                    | PLpFdLNLpassp....SA  |  |
| Consensus sequences [LFVM]-x-[FPML]-x-[FLD]-[QHGN]-[YFGNML]-x(4,9)-[STEM]-[LAI] |                      |  |

|                                                                   |              |  |
|-------------------------------------------------------------------|--------------|--|
| <b>Subgroup VIIIA</b>                                             |              |  |
| VIIIA N1                                                          |              |  |
| Pp1s7_481V6.1                                                     | LKREYtlSss.D |  |
| Pp1s293_60V6.1                                                    | LKRDYssSsddE |  |
| Pp1s293_53V6.1                                                    | VKREY..SphgE |  |
| Pp1s126_30V6.1                                                    | VNSDYccSss.D |  |
| Pp1s21_239V6.1                                                    | LKREYssSsdd  |  |
| Pp1s7_472V6.1                                                     | LKREFvySsseE |  |
| Pp1s21_247V6.1                                                    | LKREFvsSde.E |  |
| Consensus sequences [VL]-[KN]-[RS]-[DE]-[FY]-x(0,2)-S-x(2,3)-[ED] |              |  |

|                                                                         |                          |  |
|-------------------------------------------------------------------------|--------------------------|--|
| VIIIA N2*                                                               |                          |  |
| Pp1s7_481V6.1                                                           | KRvrVICTDPDATDSSsDEeDn.F |  |
| Pp1s293_60V6.1                                                          | KRvrVICTDPDATDSSgDEeDs.F |  |
| Pp1s293_53V6.1                                                          | KRvrVICTDPDATDSSsDEeDt.I |  |
| Pp1s126_30V6.1                                                          | KR..VICTDPDATDSSsDEkDn.F |  |
| Pp1s21_239V6.1                                                          | KRvrVICTDPDATDSSsDEeDn.F |  |
| Pp1s7_472V6.1                                                           | KRvrVICTDPDATDSSsDEeEs.F |  |
| Pp1s21_247V6.1                                                          | KRvrVICTDPDATDSSsDE.EgsF |  |
| Consensus sequences KR-x(0,2)-VICTDPDATDSS-x-DE-x(0,1)-[ED]-x(1,2)-[FI] |                          |  |

|                                                                                                                        |                                                     |  |
|------------------------------------------------------------------------------------------------------------------------|-----------------------------------------------------|--|
| VIIIA N3*                                                                                                              |                                                     |  |
| Pp1s7_481V6.1                                                                                                          | LRnsqqR.LvgEIytstes..Favness.....SDsELd...EpEmpSYH  |  |
| Pp1s293_60V6.1                                                                                                         | ARnphkR.FvgEIqmesqs..Itedefs.....SDnEFn...EtEtqSSH  |  |
| Pp1s293_53V6.1                                                                                                         | VRnsqrR.LvrEIhlset..Faaeess.....SDsDLd...EpEvpSYH   |  |
| Pp1s126_30V6.1                                                                                                         | VRnphrR.Lq.EIhist....Mvdesa.....SDsEvd...ElEvpSYH   |  |
| Pp1s21_239V6.1                                                                                                         | LRnsqrR.LvgEIhmsne...Fgaadels.....SDsELd...EpEvpSYH |  |
| Pp1s7_472V6.1                                                                                                          | MRssq.RvLvqEIdlsragseFmfmaesssa...SDsELdeleEsEvpSYH |  |
| Pp1s21_247V6.1                                                                                                         | MRssq.RvLvqEIdmfragpeLmamaksssssssSDsEFdeteEcEvpSYH |  |
| Consensus sequences R-x(3,4)-RK-x(0,1)-[LF]-x(1,2)-EI-x(4,8)-[LFMI]-x(5,12)-SD-x-[DE]-[FLV]-x(1,4)-E-x-E-x(2)-S-[YS]-H |                                                     |  |

|                                                                                                  |                            |  |
|--------------------------------------------------------------------------------------------------|----------------------------|--|
| VIIIA N4*                                                                                        |                            |  |
| Pp1s7_481V6.1                                                                                    | SpnFYdep.WeS.K.KnapRVlmKkV |  |
| Pp1s293_60V6.1                                                                                   | SsnFYdks.WgS.RlKap.KVseKkV |  |
| Pp1s293_53V6.1                                                                                   | SsnFYeks.WgS.K.RiapKMseKkV |  |
| Pp1s126_30V6.1                                                                                   | SsrFYkks.WgSqK.Kal.KMpeKkM |  |
| Pp1s21_239V6.1                                                                                   | SssFYdkp.WgSkK.Kap.KateK.V |  |
| Pp1s7_472V6.1                                                                                    | SasFYynpsWkSkK.Ks..KVtqKtP |  |
| Pp1s21_247V6.1                                                                                   | S..FYekplWkTmK.Ka..KVpgKtM |  |
| Consensus sequences S-x(0,2)-FY-x(3,4)-W-x-[TS]-x(0,1)-[KR]-x(0,1)-[KR]-x(1,3)-[KR]-[VMA]-x(2)-K |                            |  |

|                                                               |             |  |
|---------------------------------------------------------------|-------------|--|
| VIIIA C1                                                      |             |  |
| AT1G53170.1                                                   | LdLDLNLAPP  |  |
| Os05g41780.1                                                  | FdLDLNCPPP  |  |
| AT3G15210.1                                                   | LdLDLNLPPP  |  |
| Os05g41760.1                                                  | LpFDLNePPP  |  |
| AT1G50640.1                                                   | FgFDLNFpPL  |  |
| AT3G20310.1                                                   | FgFDLNFpPL  |  |
| AT1G28370.1                                                   | LdLDLNFpPP  |  |
| AT5G44210.1                                                   | LnLDLNLAPP  |  |
| Os01g58420.1                                                  | FdLDLNLrPPP |  |
| Consensus sequences [LF]-x-[LF]-D-L-N-x-[AP]-P-[LP] EAR Motif |             |  |

|                                                                                                 |                       |  |
|-------------------------------------------------------------------------------------------------|-----------------------|--|
| VIIIA C2*                                                                                       |                       |  |
| Pp1s7_481V6.1                                                                                   | MgScCdLgqvFLsDdFLFDFF |  |
| Pp1s293_60V6.1                                                                                  | VgSaCdLgevFLsDnFLFDFF |  |
| Pp1s293_53V6.1                                                                                  | VgSaCdLgdvFLsD.FLFDFF |  |
| Pp1s126_30V6.1                                                                                  | VgSgSgLgevFLsDdGFMDWA |  |
| Pp1s21_239V6.1                                                                                  | VeScCdLgevFLsDdFLFDFF |  |
| Pp1s7_472V6.1                                                                                   | VgSgCdLdisLLpEdIFFDLP |  |
| Pp1s21_247V6.1                                                                                  | VgSgCeLdevFLsDdLFFDFF |  |
| Consensus sequences [VM]-x-S-x-[CS]-x-L-x(3)-[FL]-L-x-[DE]-x(0,1)-[FLI]-[FLM]-[FM]-D-[FLW]-[AP] |                       |  |

|                                                                                                                                             |                                         |  |
|---------------------------------------------------------------------------------------------------------------------------------------------|-----------------------------------------|--|
| VIIIA C3*                                                                                                                                   |                                         |  |
| Pp1s7_481V6.1                                                                                                                               | VDFsaGFdcFg.GD.IgdLaFgsdqnEsLdWfNya.DIL |  |
| Pp1s293_60V6.1                                                                                                                              | LDistGFs.FleGD.LgnLaFdcdenEsMnWlnIs.DVL |  |
| Pp1s293_53V6.1                                                                                                                              | LEIaaGFd.FlgGD.LgdLaFecdysEgLdWLnst.DIL |  |
| Pp1s126_30V6.1                                                                                                                              | VEFgaGLE.F1.GddVdyLeFdcdgrEsFdWLngs.DIL |  |
| Pp1s21_239V6.1                                                                                                                              | LDFaaGLE.FleGD.IgdLaFgsdqnEsLeWlnaa.DIL |  |
| Pp1s7_472V6.1                                                                                                                               | LDFasGFd.F..GDvIgdFeFgeaetDsLaWFnsa.DML |  |
| Pp1s21_247V6.1                                                                                                                              | LDFavGFd.F..GDdIgdFeFgaaesDsLdWFsnaaDMP |  |
| Consensus sequences [LV]-[DE]-[FI]-x(2)-G-[FL]-x(1,2)-F-x(0,2)-GD-x(0,1)-[IVL]-x(2)-[FL]-x-F-x(5)-[DE]-x-[LFM]-x-W-[FL]-x(3,4)-D-[MIV]-[LP] |                                         |  |

|                                              |             |  |
|----------------------------------------------|-------------|--|
| <b>Subgroup VIIIB</b>                        |             |  |
| VIIIB C1*                                    |             |  |
| AT5G13910.1                                  | YVHSPMFsrMP |  |
| Os04g32790.1                                 | YVHSPLFSpMP |  |
| Os02g32040.1                                 | YVHSPMFSpMP |  |
| Consensus sequences Y-V-H-S-P-[ML]-F-S-x-M-P |             |  |

|                                                                          |              |  |
|--------------------------------------------------------------------------|--------------|--|
| VIIIB C2                                                                 |              |  |
| AT5G13910.1                                                              | DSFpQgFnyfGS |  |
| Os04g32790.1                                                             | DGF.Q.LggsSS |  |
| Os02g32040.1                                                             | DGF.Q.LggsSS |  |
| AT1G28160.1                                                              | EGF.NsLp..ST |  |
| Consensus sequences [ED]-[GS]-F-x(0,1)-[NQ]-x(0,1)-[FL]-x(1,3)-[GS]-[TS] |              |  |

|                                                              |               |  |
|--------------------------------------------------------------|---------------|--|
| <b>Subgroup IXa</b>                                          |               |  |
| IXa N1                                                       |               |  |
| AT5G47220.1                                                  | DyaLLEsItrHLL |  |
| AT4G17500.1                                                  | DyaFLEsItrHLL |  |
| AT5G51190.1                                                  | DqsALDlItqHLL |  |
| AT5G61600.1                                                  | Ea1AIDfIsqHLL |  |
| Consensus sequences [ED]-x(2)-[FLA]-[IL]-[ED]-x-I-x(2)-H-L-L |               |  |

|                                                                        |                  |  |
|------------------------------------------------------------------------|------------------|--|
| IXa C1                                                                 |                  |  |
| Pp1s181_69V6.1                                                         | FLee.DMmlnnIsGF  |  |
| Os07g47790.1                                                           | FMDy.DAvma..GF   |  |
| Pp1s15_234V6.1                                                         | FVDsdDMfvvgIsSL  |  |
| Pp1s41_212V6.1                                                         | YVDsdDMfaigltsSL |  |
| Pp1s14_458V6.1                                                         | YVDadDVftl...GL  |  |
| Os10g25170.1                                                           | VFDpyDVhgglA.SY  |  |
| Pp1s276_50V6.1                                                         | FVDseDMfti...GF  |  |
| Consensus sequences [VFY]-[FMLV]-[DE]-x(1,2)-D-[MVA]-x(3,6)-[SG]-[YFL] |                  |  |

|                                                                 |                  |  |
|-----------------------------------------------------------------|------------------|--|
| IXa C2*                                                         |                  |  |
| Pp1s181_69V6.1                                                  | DgMCLVPPptamVaET |  |
| Pp1s15_234V6.1                                                  | NaMCIPPPpehApEA  |  |
| Pp1s41_212V6.1                                                  | DaMCIPPPdsehAtET |  |
| Pp1s14_458V6.1                                                  | DaMCIPPPdsehAtET |  |
| Pp1s276_50V6.1                                                  | DaMCIPPPapehAtET |  |
| Consensus sequences [DN]-x-M-C-[LI]-[PV]-P-P-x(4)-[VA]-x-E-[TA] |                  |  |

|                                                                         |                   |  |
|-------------------------------------------------------------------------|-------------------|--|
| IXa C3*                                                                 |                   |  |
| Pp1s181_69V6.1                                                          | DGDeattynWEPrLWSF |  |
| Pp1s15_234V6.1                                                          | DGEegsst.WEPHLWSY |  |
| Pp1s41_212V6.1                                                          | DGEegsnt.WEPHLWSY |  |
| Pp1s14_458V6.1                                                          | DGEegsnt.WEPHLWSY |  |
| Pp1s276_50V6.1                                                          | DGEegsti.WEPHLWSY |  |
| Pp1s132_34V6.1                                                          | SDEgtsaysWEPrLWSF |  |
| Consensus sequences [DS]-[DG]-[ED]-x(5,6)-W-E-P-x-L-W-S-[FY] LWSY motif |                   |  |

|                                                                                  |                          |  |
|----------------------------------------------------------------------------------|--------------------------|--|
| <b>Subgroup IXb</b>                                                              |                          |  |
| IXb N1*                                                                          |                          |  |
| Os04g46240.1                                                                     | MDFpgda.EdFaLeFIrEhLLGgD |  |
| Os02g43820.1                                                                     | MDFsgdidDLIsLqLLhdqLLGvE |  |
| Os04g46250.1                                                                     | MDFhhgdaDdFaLeFIrEhLLGvD |  |
| Consensus sequences MDF-x(4,5)-[DE]-x-x-[IF]-x-L-x-[LF]-[LI]-x-[DE]-x-LLG-x-[DE] |                          |  |

|                     |                                                                                       |
|---------------------|---------------------------------------------------------------------------------------|
| IXb N2*             |                                                                                       |
| Pp1s58_260V6.1      | MaskyprKCrEha...SPgvggR                                                               |
| Pp1s243_70V6.1      | MvgaswnKCrRtss1rsSPrtagR                                                              |
| Pp1s79_169V6.1      | MgskiprRCaEqa...SPrgrrrR                                                              |
| Consensus sequences | M-x(6)-[KR]-C-x-[RE]-x(2,6)-S-P-x(4)-R                                                |
| IXb C1*             |                                                                                       |
| Os04g46240.1        | P.SsWSWDQYwD                                                                          |
| Os01g21120.1        | PaGLWTFEDY.E                                                                          |
| Os02g43820.1        | P.SsWSWDQL.E                                                                          |
| Os04g46250.1        | P.SsWSWEQYwE                                                                          |
| Consensus sequences | P-x(0,1)-[GS]-x-W-[TS]-[FW]-[ED]-[DQ]-[YL]-x(0,1)-[ED]                                |
| IXb C2*             |                                                                                       |
| Pp1s58_260V6.1      | LdDeLseIpnFvgE..LDheaMdfsshGEvYY                                                      |
| Pp1s243_70V6.1      | LpDnLqeIs.Fc.D..FDspsLssenyGDvYF                                                      |
| Pp1s79_169V6.1      | LdDdLasIeaImyEfdFDqeaMdcnifGDgYY                                                      |
| Consensus sequences | L-x-D-x-L-x(2)-I-x(1,2)-[FL]-x(1,2)-[DE]-x(0,2)-[FL]-D-x(3)-[LM]-x(5)-G-[ED]-x-Y-[FY] |
| Subgroup IXc        |                                                                                       |
| IXc N1              |                                                                                       |
| AT4G18450.1         | M.EmdcnpnYYrmnnsnTsdplr...SS                                                          |
| Os07g22730.1        | M.EqshshcwYygggmavTaaagagaaaSS                                                        |
| AT2G31230.1         | M.Eysqss.MYssps..Sws.....SS                                                           |
| AT3G23230.1         | MdDyslrp.FYassss.Ss.....SS                                                            |
| Pp1s265_50V6.1      | M.DqndsddMFiySilkDashsaad.SS                                                          |
| Os07g22770.1        | MaEhfshagMYigyta.DaaaSSSSSSSS                                                         |
| AT1G06160.1         | M.Eyqtn..FLsgefspEnssSSSSSS.SS                                                        |
| Os09g39850.1        | MsDrdrvdmhILtalma.DmadSSSSSSSS                                                        |
| AT3G23240.1         | M.DpfliqsPFsgfsp.Eysig...SS                                                           |
| Consensus sequences | M-x(0,1)-[ED]-x(4,6)-[YIMFP]-[YLF]-x(2,6)-[EDST]-x(1,8)-S-S                           |
| IXc C1              |                                                                                       |
| Os07g22730.1        | PVLaLKgRHSkrkR                                                                        |
| AT2G31230.1         | PVMaLKrkHs1RnR                                                                        |
| Os05g37640.1        | PVLtLKrRRRiRkR                                                                        |
| Os07g22770.1        | PVLaLKrkRHSkrkR                                                                       |
| AT1G06160.1         | PVlaLKrkHsMrnR                                                                        |
| Os09g39850.1        | PVLaLKrkRHSiRkR                                                                       |
| AT3G23240.1         | PVVaLKrkHsMrRrR                                                                       |
| Consensus sequences | PV-[MLI]-x-LK-x-[RK]-HS-x-R-x-R Postively charged Motif                               |
| IXc C2              |                                                                                       |
| AT4G18450.1         | FEFEDLGsdYLETLL                                                                       |
| Os07g22730.1        | LELEDLGadYLEELL                                                                       |
| AT2G31230.1         | VVFEDLGaeYLEQLL                                                                       |
| Os09g39810.1        | IEFEYLDghVLQEML                                                                       |
| AT3G23230.1         | FEFEYLDdkVLEELL                                                                       |
| Os10g30840.1        | IEFEYLDdkVLDDLL                                                                       |
| Os07g22770.1        | VELEDLGaeYLEELL                                                                       |
| AT1G06160.1         | VVLEDLGaeYLEELM                                                                       |
| Os09g39850.1        | VELEDLGadYLEELL                                                                       |
| AT3G23240.1         | VVFEDLGeqYLEELL                                                                       |
| Consensus sequences | [FVLI]-[EV]-[FL]-E-[DY]-L-[GD]-x(2)-[YV]-L-[EDQ]-[EDQ]-[LM]-[LM] Extended EDLL Motif  |
| IXc C3*             |                                                                                       |
| Pp1s19_272V6.1      | SEPafRHMYYETVERLASAISDPFRP                                                            |
| Pp1s345_35V6.1      | SEPayRHMYYETVERLASAISDPFRP                                                            |
| Pp1s20_184V6.1      | SEP.YKHMYESVERLASAISDPFRP                                                             |
| Pp1s121_50V6.1      | SELaYRHMYESVERLASAISDPFRP                                                             |
| Consensus sequences | SE-[PL]-x(0,1)-[FY]-[KR]-HMYE-[ST]-VERLASAISDPFRP                                     |
| Subgroup IXd        |                                                                                       |
| IXd C1              |                                                                                       |
| Os03g05590.1        | VELecLDDkVLeDLL                                                                       |
| Os04g18650.1        | VELvyLDDkVLdELL                                                                       |
| AT1G04370.1         | FEFeyLDDsVLdELL                                                                       |
| AT5G43410.1         | FEFeyLDDsVLeELL                                                                       |
| Os08g44960.1        | IELeclDDqVLqEML                                                                       |
| Consensus sequences | [VIF]-E-[LF]-x(2)-L-D-D-x-V-L-x-[ED]-[LM]-L EDLL Motif                                |
| Subgroup IXe        |                                                                                       |
| IXe N1*             |                                                                                       |
| Os03g07940.1        | MkhmTrqEFiahLRRnSSG                                                                   |
| Os07g03250.1        | MknmTrqEYVahLRRkSSG                                                                   |
| Os08g34360.1        | MegqSReEYIgsLRRkSSG                                                                   |
| Os01g59780.1        | MqrmTrEYLatLRRkSSG                                                                    |
| Os06g44750.1        | MksmTrqEFiasLRRkSSG                                                                   |
| Consensus sequences | M-x(3)-[ST]-R-x-E-[YF]-[LIV]-x(2)-L-R-R-x-S-S-G                                       |
| IXe C1              |                                                                                       |
| Os03g07940.1        | LPvFalWn....D                                                                         |
| Os07g03250.1        | MP1FaaWt....D                                                                         |
| Os08g34360.1        | AVaYd.Iaaieh.R                                                                        |
| Os01g59780.1        | AVsYa.IsslasgR                                                                        |
| Os06g44750.1        | APhFynYlfgm..E                                                                        |
| Consensus sequences | [ALM]-[VP]-x-[YF]-x(1,2)-[IFYW]-x(1,6)-[RDE]                                          |
| Subgroup Xa         |                                                                                       |
| Xa N1*              |                                                                                       |
| Os02g34270.1        | MaalFeAaEtaaIVaAltrVI                                                                 |
| Os01g64790.1        | MsgyYqAqEmstMVsALarVV                                                                 |
| Os05g36100.1        | LsgeYqAqEmstMVsALtwVV                                                                 |
| Os02g34260.1        | MaalFeAaEtaaIVaAltrVI                                                                 |
| Consensus sequences | [ML]-x(3)-[FY]-x-A-x-E-x(3)-[MI]-V-x-AL-x(2)-V-[IV]                                   |
| Subgroup Xb         |                                                                                       |
| Xb C1               |                                                                                       |
| Pp1s195_38V6.1      | KAttrLIr1R                                                                            |
| AT5G19790.1         | K1rnLLhgK                                                                             |
| Pp1s64_47V6.1       | KAarLIr1R                                                                             |
| Os07q10410.1        | R1rtILthK                                                                             |
| Os07g38750.1        | R1rgILhhK                                                                             |
| Os12g39330.1        | KVtnLL11R                                                                             |
| Consensus sequences | [RK]-x(3)-[LI]-[IL]-x(2)-[RK]                                                         |
| Xb C2*              |                                                                                       |
| Os09g28440.1        | LWDgLqDLmkLdea...Dt...Wfp.P                                                           |
| Os02g52670.1        | IWDgLrEImmLd.....Dgsf.Wsm.P                                                           |
| Os04g57340.1        | VVDdAdAstVrsrvaafDln..Lpp.P                                                           |
| Os08g36920.1        | LWEgLqDLmqLd.....Egg..LswfP                                                           |
| Consensus sequences | [VIL]-[VW]-[DE]-x-[AL]-x-[ED]-[AIL]-x(2)-[VL]-x(0,7)-[DE]-x(0,4)-[LW]-x(2,3)-P        |
| Subgroup Xc         |                                                                                       |
| Xc C1*              |                                                                                       |
| AT2G35700.1         | DGFWDSFPYEBPFLeqsY                                                                    |
| AT4G16750.1         | DGFWDSFPYEDPFFlenY                                                                    |
| Consensus sequences | D-G-F-W-D-S-F-P-Y-E-[ED]-P-F-[LF]-x(3)-Y                                              |
| Xc C2*              |                                                                                       |
| Os04g32620.1        | DLmrYaqLLqG                                                                           |
| Os02g32140.1        | DLiqYArLLrS                                                                           |
| Os11g06770.1        | EYseYArFLqG                                                                           |
| Consensus sequences | [ED]-[YL]-x(2)-Y-A-x-[FL]-L-x-[GS]                                                    |

Note that the numbers in front represent groups/subgroups, followed by N(prior to the AP2 domain) or C(after the AP2 domain). The asterisks indicate the N
