# Supplementary material for: Computational Disorder Analysis in Ethylene Response Factors Uncovers Binding Motifs Critical to Their Diverse Functions
Source: MDPI journal article supplement (doi:10.3390/ijms21010074), 2019-12-20
Supplement: s1 [file s1]

Group I

|                    |                                                                    |
|--------------------|--------------------------------------------------------------------|
| 1. Os01g66270.1    | RYRGVRRRRWGKWVSEIRVPGTRERLWLGSYATPEAAAVAHDTAVYFIRGGAG--DGGGGGATLNF |
| 2. Os05g34730.1    | RYRGVRRRRWGKWVSEIRVPGTRERLWLGSYATPEAAAVAHDAAYCLRLGGGRRAAAGGGGGLNFP |
| 3. AT1G22190.1     | LYRGVRRQRHWGKWVAEIRLPNNRTRLWLGTFTDAEEAALAYDKAAAYKLR-----GDFARLNFP  |
| 4. AT1G78080.1     | LYRGVRRQRHWGKWVAEIRLPNNRTRLWLGTFTDAEEAALAYDKAAAYKLR-----GDFARLNFP  |
| 5. AT1G36060.1     | LYRGVRRQRHWGKWVAEIRLPNNRTRLWLGTFTDAEEAALAYDRAAFKLR-----GDSARLNFP   |
| 6. Os03g09170.1    | LYRGVRRQRHWGKWVAEIRLPNNRTRLWLGTFTDAEEAALAYDSAAFRLR-----GSARLNFP    |
| 7. Os10g22600.1    | LYRGVRRQRHWGKWVAEIRLPNNRTRLWLGTFTDAEEAALAYDGAAFRLR-----GDAARLNFP   |
| 8. Os09g20350.1    | LYRGVRRQRHWGKWVAEIRLPNNRTRLWLGTFTDAEEAALAYDQAAAYRLR-----GDAARLNFP  |
| 9. Os08g31580.1    | LYRGVRRQRHWGKWVAEIRLPNNRTRLWLGTFTDAEEAALTYDQAAAYRLR-----GDAARLNFP  |
| 10. Os02g51670.1   | LYRGVRRQRHWGKWVAEIRLPKNRTRLWLGTFTDAEEAALAYDKAAFRRLR-----GDLARLNFP  |
| 11. Os06g11860.1   | MYRGVRRQRHWGKWVAEIRLPKNRTRLWLGTFTDAEEAALAYDKAAFRRLR-----GDAARLNFP  |
| 12. AT2G22200.1    | LYRGVRRQRHWGKWVAEIRLPKNRTRLWLGTFTAEKKAALAYDQAAFRLR-----GDIAKLNFP   |
| 13. AT4G39780.1    | LYRGVRRQRHWGKWVAEIRLPKNRTRLWLGTFTDAEEAAMAYDLAAYKLR-----GEFARLNFP   |
| 14. AT5G65130.1    | LYRGVRRQRHWGKWVAEIRLPKNRTRLWLGTFTAEQAALAYDQAAHKLR-----GDNARLNFP    |
| 15. Pp1s187_47V6.1 | LYRGVRRQRHWGKWVAEIRLPKNRTRLWLGTFTDAEEAALAYDAAAYKLR-----GEYARLNFP   |
| 16. Pp1s335_8V6.1  | LYRGVRRQRHWGKWVAEIRLPNNRTRLWLGTFTAEKKAAMAYDAAAYKLR-----GEYARLNFP   |
| 17. Pp1s21_214V6.1 | KYRGVRRQRHWGKWVSEIRHPQLKTRVWLGTFTAEADAAHAYDEAARLMC-----GAKARTNFP   |
| 18. Pp1s79_25V6.1  | RYRGVRRQRHWGKWVSEIRHPQLKTRVWLGTFTAEADAAHAYDEAARLMC-----GARARTNFP   |
| 19. AT1G64380.1    | LYRGVRRQRHWGKWVAEIRLPQNRMRWLGTFTDAEEAAAYADRAAYKLR-----GEYARLNFP    |
| 20. Os04g44670.1   | LYRGVRRQRHWGKWVAEIRLPNNRTRLWLGTFTDAEEAAMAYDRFAFKLR-----GENARLNFP   |

Group IIb

|                    |                                                               |
|--------------------|---------------------------------------------------------------|
| 1. AT1G21910.1     | YKGVFMR-SWGSWVSEIRAPN-QKTRIWLGSYSTAEAAARAYDVALLCLKGPQAN-LNF   |
| 2. AT1G77640.1     | YKGVFMR-SWGSWVTEIRAPN-QKTRIWLGSYSTAEAAARAYDAAALLCLKGPKAN-LNF  |
| 3. AT1G44830.1     | YKGVFMR-SWGSWVSEIRAPN-QKTRIWLGSYSTAEAAARAYDAAALLCLKGSSANNLNFP |
| 4. Os06g10780.1    | YKGVFMR-SWGSWVSEIRAPS-QKTRIWLGSYSTAEAAARAYDAAALLCLKGSAAADLNFP |
| 5. Os03g15660.1    | YKGVFMR-SWGSWVSEIRAPH-QKRRIWLGSYSTAEAAARAYDAAALLCLKGSDAM-LNF  |
| 6. Pp1s119_43V6.1  | FKGIRYRPELGRYISEIRPAQPKRKKIWLGTFTAEAAARAFDAGIFYTKKPIFY--NF    |
| 7. Pp1s86_33V6.1   | FKGIRFRPELGRYISEIRPAHPRKRIWLGTFTAEAAARAFDAGIFYTKKPIFY--NF     |
| 8. Pp1s11_280V6.1  | YKGIIRYRPELGRYISEIRPAQPKRKKIWLGTFTAEAAARAFDAGIFYTKKPINY--NF   |
| 9. Pp1s77_98V6.1   | YKGIIRYRPELGRYISEIRPAQPKRKKIWLGTFTAEAAARAFDAGIFYTKKPIDY--NF   |
| 10. AT4G31060.1    | YRGVRRK-SWGWVSEIRVPK-TGRRIWLGSYDAPEKAAARAYDAAALLFCIRGKGW-YNF  |
| 11. Pp1s373_18V6.1 | YRGVRRHPELKNWVTEIRPTA-QKRRKIWLGTFTAEAAARAYDVGIFYTGKKIPIL--NF  |

Group IIc

|                  |                                                                                         |
|------------------|-----------------------------------------------------------------------------------------|
| 1. Os09g35020.1  | KRPAGRTKFRETRHPVYRGVRRRGG---AGRWVCEWRVPGKRGRALWLGTFTAEAAARAHDAAMLALR--GGAGGGGAACLNFP    |
| 2. Os09g35030.1  | KRPAGRTKFRETRHPVFRGVRRRGN---AGRWVCEWRVPGRRGRLWLGTFTDAEGAARAHDAAMLALNAGGGGGGGGACLNFP     |
| 3. Os09g35010.1  | KRPAGRTKFRETRHPVYRGVRRRGGRPGAAAGRWVCEWRVPGARGSLWLGTFTATAAAARAHDAAMLALR-----GRAACLNFP    |
| 4. Os08g43200.1  | KRPAGRTKFQETRHPVFRGVRRRGR---AGRWVCEWRVPGSGRDLWLGTFTAEAAARAHDAAMLALC-----GASALCNFP       |
| 5. Os08g43210.1  | KRPAGRTKFHETRHPVFRGVRRRGR---AGRWVCEWRVPGRRGRLWLGTFTDAADAARAHDAAMLALR-----GRAAACLNFP     |
| 6. Os06g03670.1  | KRPAGRTKFRETRHPVYRGVRRRG---AGRWVCEWRVPEPNKK-SRIWLGTFTATAAAARAHDAAMLALR-----GRGACLNFP    |
| 7. AT1G12610.1   | KKRAGRRVFKETRHPVYRGIRRRNG---DKWVCEWRPEPTHQ-RRWLGTFTPTADMAARAHDAAMLALR-----GRSACLNFP     |
| 8. AT1G63030.1   | KKRAGRRVFKETRHPVYRGVRRRDG---DKWVCEWRPEPIHQ-RRWLGTFTPTADMAARAHDAAMLALR-----GRSACLNFP     |
| 9. AT4G25470.1   | KKPAGRKKFRETRHPVYRGVRRQNS---GKWVCEWRPEPNKK-TRIWLGTFTQTAEMAARAHDAAMLALR-----GRSACLNFP    |
| 10. AT4G25490.1  | KKPAGRKKFRETRHPVYRGVRRQNS---GKWVCEWRPEPNKK-TRIWLGTFTQTAEMAARAHDAAMLALR-----GRSACLNFP    |
| 11. AT4G25480.1  | KKPAGRKKFRETRHPVYRGVRRRNS---GKWVCEWRPEPNKK-TRIWLGTFTQTAEMAARAHDAAMLALR-----GRSACLNFP    |
| 12. AT5G51990.1  | KKRAGRKKFRETRHPVYRGVRRQNS---GKWVCEWRPEPNKK-SRIWLGTFTPTVEMAARAHDAAMLALR-----GRSACLNFP    |
| 13. Os02g45450.1 | KRRAGRTKFKEETRHPVFKGVRRRNP---GRWVCEWRPEPHGK-QRIWLGTFTAEEMAARAHDAAMLALR-----GRAACLNFP    |
| 14. Os04g48350.1 | KRRAGRTKFKEETRHPVYKGVRSNP---GRWVCEWRPEPHGK-QRIWLGTFTAEEMAARAHDAAMALR-----GRAACLNFP      |
| 15. Os01g73770.1 | KRRAGRKKFRETRHPVYRGVRRARAG---GSRWVCEWRPEPQAK-ARIWLGTFTPTVEMAARAHDAAMLALR-----GIRGALCNFP |

Group VIIa

|                     |                                                                |
|---------------------|----------------------------------------------------------------|
| 1. AT1G72360.1      | YKGIRRRPWGRWAAEIRDP-IRKGVRWLGTFTNTAEAAARAYDLEAKRIRGAKAKLNFP    |
| 2. Os07g42510.1     | YRGIRQRPWGKWAEEIRDP-RKGVRWLGTFTGTAEEAAMAYDVLEARRIRGKKAKLNFP    |
| 3. AT2G47520.1      | YRGIRQRPWGKWAEEIRDP-SKGVRWLGTFTKTADEAARAYDVAAIKIRGKKAKLNFP     |
| 4. Os03g08470.1     | IFRGIRQRPWGKWAEEIRDP-HKGTWVWLGTFTNTPEAAARAYDVLEARRIRGSSKAKLNFP |
| 5. Os02g54160.1     | FRGIRQRPWGKWAEEIRDP-RKGVRWLGTFTNSAEAAARAYDALEARRIRGKKAKLNFP    |
| 6. Os06g09390.1     | FRGIRQRPWGKWAEEIRDP-RKGVRWLGTFTNSAEAAARAYDALEARRIRGKKAKLNFP    |
| 7. Os09g26420.1     | YRGIRQRPWGKWAEEIRDP-SKGVRWLGTNTAEAAARAYDALEARRIRGKKAKLNFP      |
| 8. AT1G53910.1      | YRGIRQRPWGKWAEEIRDP-REGARWLGTFTKTAEEAARAYDAAARRIRGSKAKLNFP     |
| 9. AT3G14230.1      | YRGIRQRPWGKWAEEIRDP-RKGSREWLGTFTDAEEAARAYDAAARRIRGTAKLNFP      |
| 10. AT3G16770.1     | YRGIRKR PWGKWAEEIRDP-RKGVRWLGTFTNTAEAAAMAYDVAAKQIRGDKAKLNFP    |
| 11. Os05g29810.1    | YKGIRRRPWGRWAAEIRDP-RKGVRWLGTFTYATAEEAARAYDVAAARDIRGAKAKLNFP   |
| 12. Os01g54890.1    | YRGVRRR PWGKYAAEIRDPTRHGARLWLGTFTGTAEEAAAYDRAAFMRGAKALLNFP     |
| 13. Pp1s140_167V6.1 | FRGGRRPWGKFAAEIRDSTRHGSRLWLGTFTDAEEAALACDDAAQLRGSRALLNFP       |
