# Supplementary figures and images for: Computational Disorder Analysis in Ethylene Response Factors Uncovers Binding Motifs Critical to Their Diverse Functions
Source: MDPI journal article supplement (doi:10.3390/ijms21010074), 2019-12-20

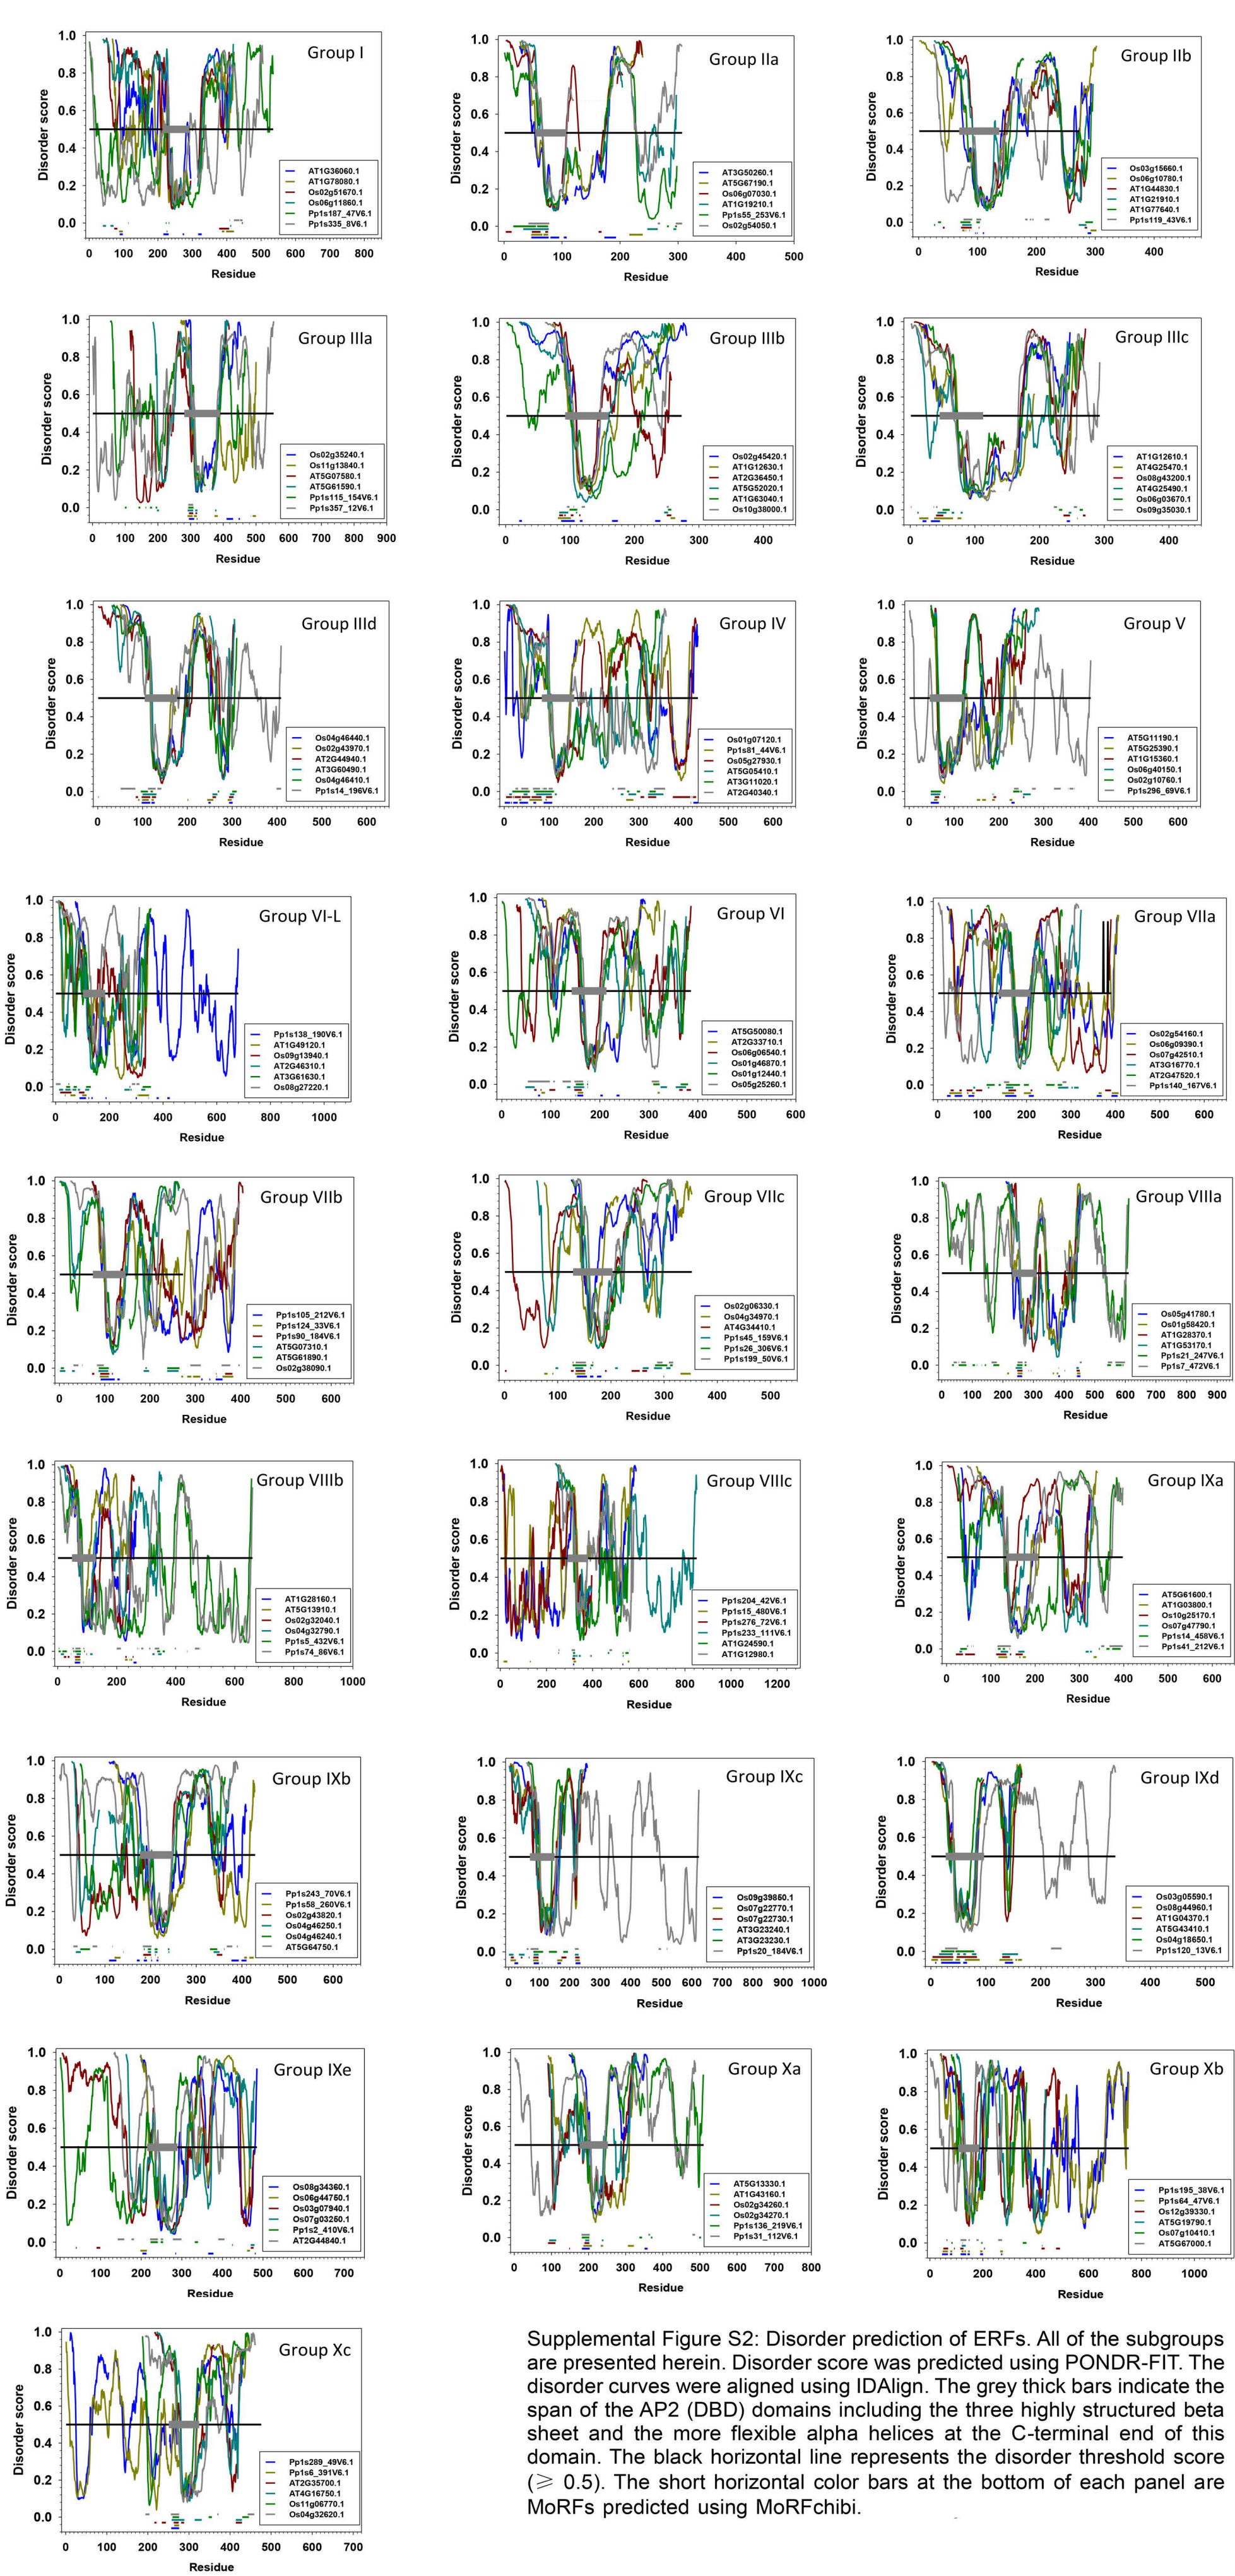

Supplement: s1 [file s1]

Group I

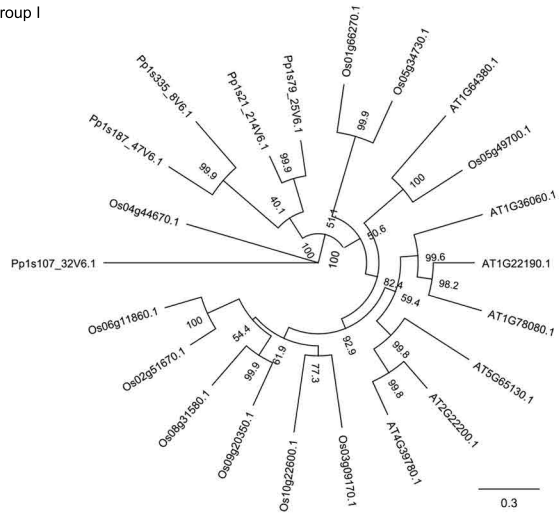

Group IIc

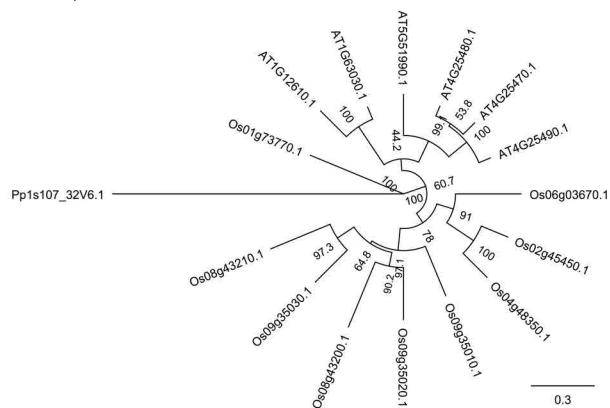

Group VIIa

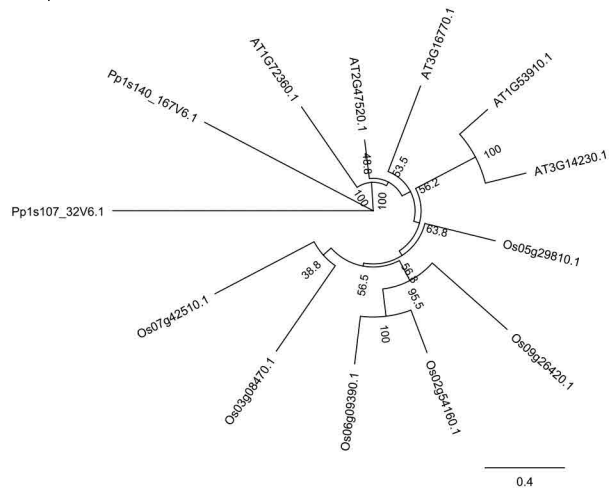

Group IIb

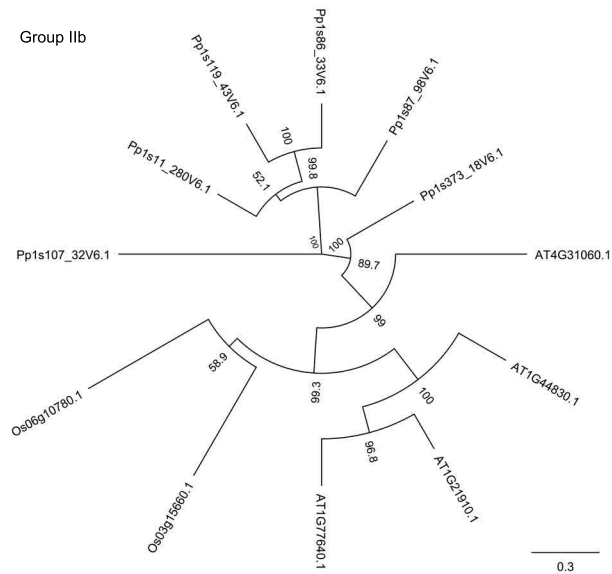

Supplement: s1 [file s1]
